# Supplementary material for: Randomised controlled trial of a web-based low carbohydrate diet intervention for adults with type 2 diabetes: the T2Diet study protocol
Source: PubMed Central journal article supplement — BMJ Open. 2022 Feb 21;12(2):e054594. doi: 10.1136/bmjopen-2021-054594 (PMC8862456; doi:10.1136/bmjopen-2021-054594), 2022-02-21
Supplement: bmjopen-2021-054594.draft_revisions.pdf [file bmjopen-2021-054594.draft_revisions.pdf]

# BMJ Open

BMJ Open is committed to open peer review. As part of this commitment we make the peer review history of every article we publish publicly available.

When an article is published we post the peer reviewers' comments and the authors' responses online. We also post the versions of the paper that were used during peer review. These are the versions that the peer review comments apply to.

The versions of the paper that follow are the versions that were submitted during the peer review process. They are not the versions of record or the final published versions. They should not be cited or distributed as the published version of this manuscript.

BMJ Open is an open access journal and the full, final, typeset and author-corrected version of record of the manuscript is available on our site with no access controls, subscription charges or pay-per-view fees (<http://bmjopen.bmj.com>).

If you have any questions on BMJ Open's open peer review process please email [info.bmjopen@bmj.com](mailto:info.bmjopen@bmj.com)

# BMJ Open

## Randomized controlled trial of a web-based low carbohydrate diet intervention for adults with type 2 diabetes: The T2Diet study protocol

|                               |                                                                                                                                                                                                                                                                                                                                                                                                                                                                                                                                                                                                                          |
|-------------------------------|--------------------------------------------------------------------------------------------------------------------------------------------------------------------------------------------------------------------------------------------------------------------------------------------------------------------------------------------------------------------------------------------------------------------------------------------------------------------------------------------------------------------------------------------------------------------------------------------------------------------------|
| Journal:                      | <i>BMJ Open</i>                                                                                                                                                                                                                                                                                                                                                                                                                                                                                                                                                                                                          |
| Manuscript ID                 | bmjopen-2021-054594                                                                                                                                                                                                                                                                                                                                                                                                                                                                                                                                                                                                      |
| Article Type:                 | Protocol                                                                                                                                                                                                                                                                                                                                                                                                                                                                                                                                                                                                                 |
| Date Submitted by the Author: | 17-Jun-2021                                                                                                                                                                                                                                                                                                                                                                                                                                                                                                                                                                                                              |
| Complete List of Authors:     | Dening, Jedha; Deakin University, Institute for Physical Activity and Nutrition, School of Exercise and Nutrition Sciences<br>George, Elena; Deakin University, Institute for Physical Activity and Nutrition, School of Exercise and Nutrition Sciences<br>Ball, Kylie; Deakin University, Institute for Physical Activity and Nutrition, School of Exercise and Nutrition Sciences<br>Mohebbi, Mohammadreza ; Deakin University, Biostatistics Unit, Faculty of Health<br>Shariful Islam, Sheikh Mohammed; Deakin University, Institute for Physical Activity and Nutrition, School of Exercise and Nutrition Sciences |
| Keywords:                     | General diabetes < DIABETES & ENDOCRINOLOGY, NUTRITION & DIETETICS, PUBLIC HEALTH, Clinical trials < THERAPEUTICS, World Wide Web technology < BIOTECHNOLOGY & BIOINFORMATICS                                                                                                                                                                                                                                                                                                                                                                                                                                            |
|                               |                                                                                                                                                                                                                                                                                                                                                                                                                                                                                                                                                                                                                          |

SCHOLARONE™  
Manuscripts

## Randomized controlled trial of a web-based low carbohydrate diet intervention for adults with type 2 diabetes: The T2Diet study protocol

Jedha Dening<sup>1</sup>, Elena George<sup>1#</sup>, Kylie Ball<sup>1#</sup>, Mohammadreza Mohebbi<sup>2</sup>, Sheikh Mohammed Shariful Islam<sup>1#</sup>

# Equal Contribution

<sup>1</sup> Institute for Physical Activity and Nutrition, School of Exercise and Nutrition Sciences, Deakin University, Locked Bag 20000, Geelong, Victoria, 3220, Australia

<sup>2</sup> Biostatistics Unit, Faculty of Health, Deakin University, Locked Bag 20000, Geelong, Victoria, 3220, Australia

### Corresponding Author:

Jedha Dening

Institute for Physical Activity and Nutrition

School of Exercise and Nutrition Sciences

Deakin University

Locked Bag 20000

Geelong, Victoria, 3220

Australia

Phone: 61 3 924 68393

Email: [deningje@deakin.edu.au](mailto:deningje@deakin.edu.au)

### Word count

Abstract: 268; Keywords: 6; Article: 3603; Figures: 2; Tables: 1; References: 67.

## Abstract

**Introduction:** Standard care for patients with type 2 diabetes (T2D) consists of routine physician appointments to monitor glycemic status and overall health. Dietary modification is an essential component of T2D management. Evidence suggests a low carbohydrate diet (LCD) provides better clinical outcomes for people with T2D compared to other diets. However, providing dietary support in face-to-face settings is challenged by issues of availability and accessibility. Digital interventions can help bridge this gap. The objective of this paper is to describe the protocol of a randomized controlled trial (RCT) of a web-based intervention that will evaluate the effectiveness of standard care plus web-based LCD intervention when compared to standard care only.

**Methods and analysis:** In a two-arm parallel RCT, 100 adults with T2D will be randomized to either a theoretically-informed 16-week automated web-based LCD intervention plus standard care or standard care only. LCD recommendations emphasize consuming nutrient-dense whole foods and encourage a daily carbohydrate goal of 50-100 grams, with an objective of achieving 10-26% carbohydrates from total energy intake. Assessments will take place at baseline and 16-weeks. The primary outcome will be hemoglobin A1c (HbA1c). Additional data collected will include dietary intake, self-efficacy, weight and height, anti-diabetes medication and dosages, and diabetes-related comorbidities. Process evaluation will consist of a mixed-methods assessment of website engagement metrics, user experience, and participants' perspectives.

**Ethics and dissemination:** All study procedures have been approved by the Deakin University Human Research Ethics Committee (2020-349). Study findings will be disseminated widely through public, professional, and academic presentation and publication.

**Trial registration:** The trial has been prospectively registered with the Australian New Zealand Clinical Trials Registry (ACTRN12621000096853).

**Keywords:** Type 2 diabetes, low carbohydrate diet, glycemic control, self-management, web-based, HbA1c.

### Strengths and limitations of this study

- To the best of our knowledge, this study is the first web-based study to evaluate the effectiveness of a low carbohydrate diet (10- $<$ 26% energy intake) on glycemic control in adults with type 2 diabetes.
- A key strength of the study is the randomized controlled design and robust outcome assessment using hemoglobin A1c that will minimize bias and maximize the validity of the study findings.
- One limitation is no long term follow up, as this was not feasible for this study.

### Introduction

The global burden of T2D was estimated at 462 million individuals in 2017 [1]. Due to metabolic changes, T2D results in high glycemic status, frequently measured by HbA1c. The primary treatment goal is to assist people with T2D to achieve a HbA1c below 7.0% [2]. However, in 2020, estimates indicated 50% of adults with T2D had uncontrolled T2D, with HbA1c levels above the treatment goal [3]. Uncontrolled T2D significantly contributes to the development of diabetes complications and mortality [3]. Standard care for patients with T2D consists of routine health checks with a primary care physician to monitor glycemic status, diabetes complications and overall health [2, 4]. In addition, healthy behavior should be routinely encouraged before or in conjunction with pharmacological treatment if necessary [4].

Dietary modification plays an integral role in diabetes management, in improving glycemic control and overall health [2]. In terms of diet, a low fat, moderate-high carbohydrate diet has traditionally been a common dietary recommendation provided to people with T2D [4, 5]. However, a growing body of evidence has demonstrated a LCD, defined as 10- $<$ 26% carbohydrate of total energy intake [6, 7], may be more optimal for improving clinical outcomes in people with T2D [6, 8, 9]. Systematic reviews and meta-analyses of LCDs in people with T2D have demonstrated greater improvements in glycemic control, increases in HDL cholesterol,

1  
2  
3 decreases in triglycerides, reduced medication requirements [6, 8-11], and greater potential for  
4 diabetes remission [9].  
5  
6  
7

8 LCD interventions for people with T2D have typically been delivered in face-to-face settings [8].  
9  
10 However, people with T2D face substantial challenges in accessing dietary support due to  
11 limited availability, accessibility, and cost barriers [2, 12-14]. Web-based interventions can  
12 bridge this gap, offering the potential for greater reach and accessibility, with the advantage of  
13 being convenient and on-demand to participants when required [15]. Systematic reviews of web-  
14 based comprehensive self-management interventions in people with T2D have demonstrated  
15 favorable improvements in glycemic control [16-18]. Preliminary evidence suggested web-based  
16 dietary interventions may be an effective way to support dietary change and improved glycemic  
17 status in adults with T2D [19]. Furthermore, web-based interventions in people with T2D have  
18 shown promise as a cost-effective option [20], with the capacity to be widely implemented to  
19 support routine primary care [21]. No RCT to date has assessed the effectiveness of a LCD  
20 intervention in individuals with T2D, delivered in a web-based setting.  
21  
22  
23  
24  
25  
26  
27  
28  
29

30  
31 The study protocol for a RCT of a web-based LCD program for adults with T2D is presented  
32 here. The primary aim of this study is to determine the effectiveness of a web-based LCD  
33 intervention on glycemic control in adults with T2D. We hypothesize that the web-based LCD  
34 intervention plus standard care will result in better glycemic control—lower HbA1c levels—at  
35 16 weeks compared to standard care alone in adults with T2D. Secondary aims are to assess  
36 changes in dietary intake, self-efficacy, weight and body mass index (BMI), anti-diabetes  
37 medication and diabetes-related comorbidities; and to assess process outcomes related to user  
38 engagement and experience.  
39  
40  
41  
42  
43  
44  
45

## 46 **Methods**

### 47 **Study design**

48  
49 The T2Diet study is a 16-week two-arm parallel RCT that aims to investigate the effectiveness of  
50 a web-based LCD intervention plus standard care versus standard care alone on glycemic control  
51 in 100 Australian-based adults with T2D (Figure 1). A period of 16 weeks was chosen as  
52  
53  
54  
55  
56  
57  
58  
59  
60

1  
2  
3 previous web-based dietary interventions demonstrated significant improvements in glycaemic  
4 control could be achieved within this timeframe [19].  
5  
6  
7

8 Inclusion criteria will be adults aged 40-89 years, the most highly affected demographic for T2D  
9 in Australia [22], with non-insulin-dependent T2D and self-reported HbA1c levels  $\geq 7.0\%$  within  
10 the previous six months; access to the Internet; an active email address; able to read and  
11 understand English; based in Australia; and willing and able to provide informed consent.  
12  
13

14 Exclusion criteria will be people with type 1 diabetes, prediabetes or gestational diabetes; people  
15 with diagnosed renal or cardiovascular disease; people with a terminal disease or severe  
16 complications compromising the quality of life of the participant and their ability to participate  
17 according to the protocol; women who are pregnant or lactating; people who have undergone  
18 bariatric surgery; vegetarians or vegans; people currently on a weight loss program or who have  
19 taken a weight loss program within the past 3 months; people enrolled in other clinical studies;  
20 and people at risk of disordered eating, assessed during screening with the Eating Attitudes Test-  
21 26 [23, 24]. Participants identified with potential eating disorders will be referred to The  
22 Butterfly Foundation National Helpline [25]. Informed consent will be obtained from eligible  
23 participants prior to entry into the study.  
24  
25  
26  
27  
28  
29  
30  
31  
32  
33  
34  
35  
36  
37  
38  
39  
40  
41  
42  
43  
44  
45  
46  
47  
48  
49  
50  
51  
52  
53  
54  
55  
56  
57  
58  
59  
60

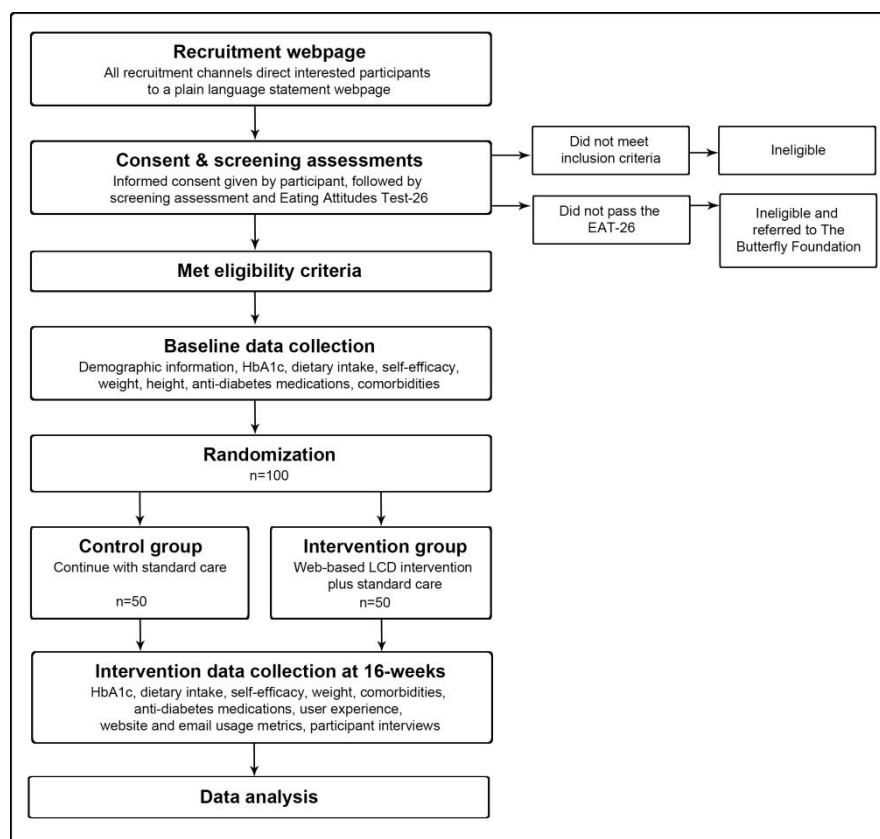

**Figure 1. Study flow chart**

## Intervention

The intervention is a theoretically informed 16-week automated web-based LCD behavior change support program. Existing website resources were licensed for this study. Subsequently, four phases of inquiry were conducted with end-users (adults with T2D) to inform development of the new web-based dietary intervention. The weekly behavior change modules adopt various behavior change techniques [26] and were constructed upon a theoretical framework, consisting of: 1) self-efficacy theory [27]—self-efficacy being a key determinant of self-care behaviors and glycemic control in T2D [28-31]; 2) positive message framing—using language that communicates benefits rather than scare tactics [32, 33]; and, 3) principles of persuasive technology—using technology as a means of persuasively communicating intervention content [34].

## Dietary recommendations

Intervention participants will receive web-based recommendations to consume an *ad libitum* LCD [10], and encouraged to consume between 50-100 grams carbohydrates per day [6]. The



1  
2  
3 overall goal is to achieve a low carbohydrate intake, defined as 10-26% total energy intake [6,  
4 7]. Web-based resources emphasize high consumption of non-starchy vegetables, adequate  
5 dietary fiber, and selection of nutrient-dense sources of lower carbohydrate foods [2].  
6  
7 Participants will be instructed to avoid or minimize high carbohydrate food and beverage sources  
8 such as added sugar, sugar-sweetened beverages [2, 5, 35], starchy foods [36, 37], and  
9 discretionary foods [2, 5, 35]. There will be no specific prescription for other macronutrients.  
10  
11 However, based on estimated energy intake for the demographic of this study ranging from 1600  
12 calories/6694 kilojoules to 2400 calories/10041 kilojoules [38], the protein and fat ranges are  
13 estimated to fall between 60-180 grams (15-30% estimated energy intake) and 80-200 grams  
14 (45-75% estimated energy intake), respectively [2, 39-41]. Web-based recommendations  
15 encourage nutrient-dense sources of protein and fat [36, 37], emphasizing consumption of  
16 polyunsaturated and monounsaturated fat [2, 35], and suggesting reduced-fat dairy may be  
17 preferred [42]. To facilitate implementation, skills-based resources such as recipes, information  
18 on T2D, food and beverage choices, menu examples, eating out tips, menu planning and food  
19 preparation tips, an interactive planner, and cooking demonstrations are provided.  
20  
21  
22  
23  
24  
25  
26  
27  
28  
29

### 30 *Web-based intervention delivery*

31 Intervention participants will be provided with login details for the study website to access the  
32 weekly modules and on-demand resources. The weekly modules consist of short videos with  
33 brief overviews, links to further resources, recipe suggestions, and action steps (Figure 2). These  
34 delivery methods, particularly the use of video, have been shown to address various levels of  
35 literacy [43], enhance engagement [44], and support health behavior change [45]. The weekly  
36 modules will be delivered sequentially, however, participants can continue to access any  
37 previous weeks' modules, along with accessing on-demand resources at any time. To prompt  
38 website usage and performance of behavioral actions, reminders will be sent to participants via  
39 email twice per week [43, 46]. It is estimated participants will login to the website once per  
40 week.  
41  
42  
43  
44  
45  
46  
47  
48  
49

### 50 *Adverse effects*

51 Intervention participants will be provided with education about and resources on how to manage  
52 potential adverse effects of carbohydrate reduction, such as constipation, headache and brain fog,  
53  
54  
55  
56  
57  
58  
59

1  
2  
3 halitosis, muscle cramps, tiredness and fatigue, hunger and cravings, and heart palpitations [37,  
4 47]; temporary hypoglycemic-like symptoms; hypoglycemia, defined as a blood glucose level  
5 <70mg/dL/<4.0mmol/L; and to identify symptoms of ketoacidosis, for any participant taking  
6 sodium glucose cotransporter 2 inhibitor medications [2]. Participants will be able to report  
7 adverse effects via an online form. If participants request assistance, they will be directed to  
8 appropriate resources, and/or, advised to consult with their treating physician. Any adverse  
9 effects will be documented and reported with trial outcomes.  
10  
11  
12  
13  
14  
15

### 16 17 *Standard care*

18 Participants in both groups will be advised to continue with their standard care, defined by the  
19 Royal Australian College of General Practitioners [4], as routine appointments with their  
20 physician to monitor glycemetic control, diabetes complications, and other health parameters.  
21  
22  
23  
24  
25  
26  
27  
28  
29  
30

### 31 **Control condition**

32 The control group will be standard care, as defined above. Participants in the control group will  
33 be on a waitlist and provided with the opportunity to participate in the intervention after  
34 completing the study.  
35  
36  
37  
38  
39  
40  
41  
42  
43  
44  
45  
46  
47  
48  
49  
50  
51  
52  
53  
54  
55  
56  
57  
58  
59  
60

## Week 2 Modules

T2Diet guidelines recap   Benefits of fibre   Understanding T2D   Healthy blood sugar   Recipe suggestions   Action steps

**Week 2. T2Diet Guidelines Recap (Video - 3:41 minutes)**



**Brief overview**

**2 Essential Rules to Follow**

**Rule #1: Eat Nutrient Dense Real Food**

This means avoiding processed foods as much as possible and choosing fresh foods that contain more nutrients to help improve your health.

**Rule #2: Avoid or Minimise Sugar & Starchy Foods**

Sugar: many packaged food products contain high amounts of added sugar. Many beverages also contain a lot of sugar, including fruit juice which contains high amounts of naturally occurring sugar.

Starchy foods: potatoes, sweet potatoes, corn, bread, rice, pasta, noodles, cereals, flour and flour-based products.

**Figure 2: Presentation format of the weekly behavior change modules**

## Outcomes

Primary and secondary outcomes will be measured at baseline and immediately post-intervention (16 weeks). An overview of study measures, data collection instruments and their timepoints is presented in Table 1. The primary outcome will be glycemic control measured by the mean difference of change in HbA1c between intervention and control group from baseline to 16

1  
2  
3 weeks. For secondary outcomes, dietary intake data—food, beverages and dietary supplements,  
4 will be collected to assess participants' adherence to the recommended LCD. We will also  
5 explore improvements in the quality of the participants' diet such as changes in discretionary  
6 food intake and vegetable consumption, and changes to individuals' overall macro and  
7 micronutrient intake and food groups. In addition, we will explore the association between  
8 adherence to diet and glycemic control. Self-efficacy will be measured to assess whether  
9 participants' self-efficacy improves and whether self-efficacy predicts and promotes greater  
10 changes in glycemic control [28-31]. Weight and height will be collected to assess change in  
11 weight and BMI (kg/m<sup>2</sup>). To assess confounding factors, anti-diabetes medication and dosages,  
12 and diabetes-related comorbidities [4] will be collected.  
13  
14  
15  
16  
17  
18  
19  
20  
21

### 22 *Process evaluation*

23  
24 Post-intervention, a mixed-methods approach [48] will be used to explore website utilization,  
25 user engagement and experience, in the intervention group only. Two forms of quantitative data  
26 will be collected: 1) website and email usage rates for frequency, intensity and duration metrics  
27 [49], collected for each week of the 16-week intervention; and 2) a self-administered  
28 questionnaire using the User Engagement Scale short form [50] and Honeycomb Model [51, 52].  
29 To collect qualitative data, 20 participants [53] will be invited to attend a semi-structured phone  
30 interview. Process evaluation will be reported separately to the primary and secondary outcomes  
31 of this trial.  
32  
33  
34  
35  
36  
37  
38  
39  
40  
41  
42  
43  
44  
45  
46  
47

48 **Table 1. Summary of outcome measures, data collection instruments and timepoint**

| Measures | Instrument | Timepoint |
|----------|------------|-----------|
|          |            |           |

|                                                                          |                                                                                                                                                     | Baseline | 16 weeks |
|--------------------------------------------------------------------------|-----------------------------------------------------------------------------------------------------------------------------------------------------|----------|----------|
| Demographic information                                                  | Structured questionnaire, self-reported via an online request form.                                                                                 | X        |          |
| <b>Primary outcome</b>                                                   |                                                                                                                                                     |          |          |
| Hemoglobin A1c (%)                                                       | Collected and assessed using the Nutripath Integrative Pathology Services HbA1c microsample self-administered postal test.                          | X        | X        |
| <b>Secondary outcomes</b>                                                |                                                                                                                                                     |          |          |
| Dietary intake: food, beverage and dietary supplements                   | Assessed via self-reported 24-hour food recall using study-specific online questionnaire, analysis using FoodWorks professional nutrition software. | X        | X        |
| Self-efficacy                                                            | Self-reported via an online request form using the Diabetes Management Self-Efficacy Scale—Australian version [54].                                 | X        | X        |
| Weight/BMI                                                               | Self-reported weight and height, via a study-specific online request form.                                                                          | X        | X        |
| <b>Confounders</b>                                                       |                                                                                                                                                     |          |          |
| Anti-diabetes medication and dosages, and diabetes-related comorbidities | Self-reported, via a study-specific online request form.                                                                                            | X        | X        |
| <b>Process outcomes (Intervention group only)</b>                        |                                                                                                                                                     |          |          |
| Website utilization                                                      | Website and email usage metrics.                                                                                                                    | ←        | →        |
| User engagement and experience                                           | Self-reported using the User Engagement Scale short form [50] and Honeycomb Model [51, 52], via an online request form.                             |          | X        |
| Participants' experience                                                 | Semi-structured phone interviews with up to 20 participants.                                                                                        |          | X        |

### Sample size

A total of 100 participants (50 per group) will provide 80% power at *type I error of 0.05* to detect a between-group difference of 0.5% on HbA1c (primary outcome). In terms of clinical relevance, a decrease in HbA1c of 0.5% may avert cardiovascular disease events by 10% over 5

1  
2  
3 years [55]. An estimated 12% of diabetes-related deaths could be prevented by lowering HbA1c  
4 by a modest 0.1% [56]. The sample size is based on the following assumptions: a standard  
5 deviation of 0.9 HbA1c [57, 58], a pre-post intervention correlation of 0.5 [59], and a drop-out  
6 rate of 20% [60, 61]. The sample size calculation was conducted by an independent statistician  
7 using Stata's power twomeans command.  
8  
9  
10  
11  
12

### 13 **Recruitment**

14 Enrolment of 100 participants will occur nationally across Australia using social media  
15 (primarily Facebook, Twitter and LinkedIn); networking with colleagues and acquaintances;  
16 community publications, newsletters or radio; through diabetes clinics, community  
17 organizations, fitness centers or medical centers; snowballing; and if necessary, paid online  
18 advertising via Facebook. All recruitment channels will direct interested participants to a plain  
19 language statement webpage where participants can voluntarily provide their informed consent.  
20 After giving informed consent, participants are immediately redirected to the eligibility screening  
21 questionnaire. Eligible participants will then be required to complete all baseline measurements  
22 (Table 1) before being randomized to their allocated group. Following intervention completion at  
23 16-weeks, participants will be required to complete the same measurements, excluding  
24 demographic details and height (Table 1). Recruitment started in February 2021 and is expected  
25 to be completed by December 2021.  
26  
27  
28  
29  
30  
31  
32  
33  
34  
35  
36  
37

### 38 **Assignment of interventions**

39 Participants will be randomized in a 1:1 ratio to standard care (control group) or standard care  
40 plus web-based LCD intervention (intervention group) using block randomization with varying  
41 random block sizes and stratified by age and gender. A computer-generated predetermined  
42 randomization schedule will be produced and held off-site by an independent statistician, who  
43 will indicate the group allocation as eligible participants are recruited. The group allocation will  
44 be concealed from researchers and participants until all baseline measures have been collected  
45 and the independent statistician has conducted the randomization. Outcome assessors and data  
46 analysts will be blinded to group allocation.  
47  
48  
49  
50  
51  
52  
53  
54

### 55 **Data collection tools**

1  
2  
3 Aside from HbA1c, all points of data collection will occur online through structured  
4 questionnaires with self-reported entries, for both groups. Demographic information such as age,  
5 gender, duration of T2D, family history of T2D, country of birth, employment status, education  
6 level, relationship status, and smoking status will be collected at baseline for descriptive  
7 purposes.  
8  
9

10  
11  
12  
13 HbA1c will be assessed using Nutripath Integrative Pathology Services HbA1c microsample test,  
14 a self-administered test that will be mailed to participants and back to the pathology service.  
15 HbA1c is the most common clinical biomarker used to assess glycemic control in RCTs that  
16 include people with T2D [8].  
17  
18  
19

20  
21  
22 Dietary intake will be assessed using 24-hour food recall, a comprehensive self-report instrument  
23 that is considered highly robust [62]. An online 24-hour food recall questionnaire will collect  
24 participants' self-report of foods, beverages, and supplements consumed in the previous 24-hour  
25 period. Submissions will be reviewed and if necessary, participants will be contacted for  
26 additional detail. FoodWorks professional nutrition analysis software for Australia and New  
27 Zealand will be used for assessment.  
28  
29  
30  
31

32  
33  
34 Self-efficacy will be measured using the Diabetes Management Self-Efficacy Scale—Australian  
35 version [54], which has been validated for use in people with T2D in Australia. The scale  
36 contains 20 questions rated on a 10-point scale. Responses are then summed to present a single  
37 self-efficacy score. Higher scores indicate greater self-efficacy.  
38  
39  
40  
41

42  
43 Self-reported weight and height, anti-diabetes medication and dosages, and diabetes-related  
44 comorbidities will be collected. Online self-reported weight and height has been demonstrated to  
45 be a valid method [63]. The checklist of comorbidities was drawn from the Royal Australian  
46 College of General Practitioners guidelines on general practice management of T2D [4].  
47  
48  
49

#### 50 **Participant retention and withdrawal**

51 To accommodate any loss, multiple imputations will be used to handle the missing data (either as  
52 primary or sensitivity analysis), using available data to minimize potential bias of estimated  
53 intervention effects due to non-random attrition. In addition, when measurement data is  
54  
55  
56  
57  
58  
59

1  
2  
3 due/overdue, emails and/or text message reminders and phone calls to participants will be made.  
4 All participants completing this study will receive a \$30AUD shopping voucher. Participants are  
5 free to withdraw from the study for any reason, up until data analysis commences.  
6  
7  
8  
9

### 10 **Data management and protection against bias**

11 Significant measures have been put in place to ensure robust data management and integrity and  
12 protect against bias. Primary outcome reports and self-reported data files will be downloaded in  
13 their wholly original unmodified form by the principal investigator and securely stored in a  
14 location inaccessible to other research team members. These original data files will not be  
15 modified. Copies of original data files will be provided to research team members as required.  
16 Data that requires manual entry will be crosschecked against copies of the original data files by a  
17 second research team member. An independent statistician will be provided with a copy of the  
18 original or crosschecked data files to collate and clean the dataset in preparation for data  
19 analysis. Once complete, the coded, de-identified dataset will be securely stored by the principal  
20 investigator, as the lockdown dataset files, in a location inaccessible to other research team  
21 members. These lockdown dataset files will not be modified. Copies of the lockdown dataset will  
22 be shared with research team members as required. A dedicated study statistician will be  
23 provided with a copy of the lockdown dataset files to conduct the data analysis independently.  
24  
25  
26  
27  
28  
29  
30  
31  
32  
33  
34  
35

### 36 **Monitoring**

37 Overall study monitoring occurs via monthly meetings involving the research team members.  
38  
39  
40

### 41 **Data availability statement**

42 Data will be available upon reasonable request.  
43  
44  
45  
46  
47  
48  
49

### 50 **Statistical methods**

51 All data will be imported into Stata for quantitative analysis. Baseline characteristics will be  
52 presented using descriptive statistics. The mean and standard deviation, or median and range,  
53 will be used to describe continuous variables. Frequencies and/or percentages will be used to  
54  
55  
56  
57  
58  
59  
60



1  
2  
3 describe categorical variables. Intervention effects (i.e., mean difference between intervention  
4 and control group) at 16 weeks will be evaluated by implementing an ANCOVA model for each  
5 outcome with the 16-week value of the outcome as the dependent variable, and treatment group  
6 and baseline outcome score as independent variables, and adjusting for stratification variables  
7 (age and gender). Multiple imputation techniques with missing at random assumption will be  
8 used to impute missing data due to dropouts or withdrawals to comply with the intention-to-treat  
9 approach. Sensitivity analysis will be performed to evaluate missing at random assumption for  
10 missing observation pattern. Subgroup analysis will be conducted with the duration of diabetes  
11 and gender. For the duration of diabetes, a median split will be used to define subgroups. P-value  
12 0.05 will be used as the level of significance for the primary outcome and all secondary  
13 outcomes. Cohen's D effect size will be calculated and reported. For all continuous outcomes,  
14 data will be explored for deviation from the normal distribution assumptions. If necessary, a  
15 transformation of data (e.g., log transformation) or a non-parametric approach may be  
16 considered.  
17  
18  
19  
20  
21  
22  
23  
24  
25  
26  
27  
28

### 29 **Patient and public involvement**

30  
31 Participants (adults with T2D) were engaged in four iterative phases of user-centered inquiry  
32 involving group discussions, which informed the development of the new web-based dietary  
33 intervention. Intervention participants will be involved in feedback during process evaluation.  
34  
35  
36

### 37 **Ethics and dissemination**

38  
39 All study procedures have been approved by the Deakin University Human Research Ethics  
40 Committee (2020-349). Any protocol amendments will be submitted for approval to the ethics  
41 committee prior to implementation and communicated via an update of the Australian and New  
42 Zealand Clinical Trial Registry.  
43  
44  
45  
46

47 Key audiences this research may benefit include the general public, researchers, clinicians,  
48 policymakers, and healthcare organizations [64-66]. Various methods may be used to  
49 disseminate the findings, including peer-reviewed publication, presentations, consumer and  
50 professional publication, and social media [66, 67]. Participants involved in the study will be  
51  
52  
53  
54  
55  
56  
57  
58  
59  
60

1  
2  
3 sent a summary report of the study's main outcomes via email. In any dissemination of research  
4 findings, participants' identities will remain confidential.  
5  
6  
7

## 8 **Discussion**

9  
10 This study will conduct a RCT of standard care alone versus standard care plus web-based LCD  
11 intervention in adults with T2D, with the primary intervention objective of improving glycemic  
12 control. To meet the needs and context of end-users who will participate in the study, user-  
13 centered principles and involvement of end-users in numerous rounds of feedback and iterative  
14 development were employed. The weekly behavior change modules apply various behavior  
15 change techniques and were constructed upon a theoretical framework to help strengthen  
16 communication of the intervention, address literacy levels, and maintain engagement. In  
17 addition, the email reminder notifications aim to boost website usage and motivation to  
18 participate.  
19  
20  
21  
22  
23  
24  
25  
26

27 This study will be the first RCT of a LCD intervention for adults with T2D, delivered in a web-  
28 based setting. The findings will contribute valuable insights into whether a LCD is effective  
29 when delivered in a web-based environment; and whether such an intervention could be  
30 considered to support T2D management more broadly. Further, this study will contribute new  
31 knowledge to inform future digitally-delivered dietary interventions that could be used to reach a  
32 greater number of people with T2D and other health conditions across Australia and  
33 internationally.  
34  
35  
36  
37  
38  
39  
40

## 41 **Acknowledgment**

42 We thank Dr Gavin Abbott and Professor Ralph Maddison from Deakin University Institute of  
43 Physical Activity and Nutrition for their contributions.  
44  
45  
46  
47  
48  
49

## 50 **Funding**

51 This work will be supported by allocated annual PhD student funds from Deakin University  
52 Institute of Physical Activity and Nutrition.  
53  
54  
55  
56  
57  
58  
59  
60

### Conflicts of Interest

JD is co-owner of Diabetes Meal Plans, a web-based nutrition support service for people with type 2 diabetes and prediabetes, who licensed the web-platform for this study.

### Authorship

JD conceived and designed the study and wrote the manuscript. SI, EG, KB made critical contributions to the study design and provided critical input and revisions to the manuscript. MM contributed to the study design and provided critical revisions of the manuscript. All authors provided final approval for submission of the manuscript.

### Abbreviations

BMI: body mass index

T2D: type 2 diabetes

HbA1c: hemoglobin A1c

LCD: low carbohydrate diet

RCT: randomized controlled trial

### References

1. Khan, MAB, Hashim, MJ, King, JK, et al., *Epidemiology of Type 2 Diabetes - Global Burden of Disease and Forecasted Trends*. J Epidemiol Glob Health, 2020. **10**(1): p. 107-111. <https://doi.org/10.2991/jegh.k.191028.001>.

2. American Diabetes Association, *Standards of Medical Care in Diabetes*. Diabetes Care, 2021. **44**: p. S1-S232. <https://doi.org/10.2337/dc21-in01>.
3. Centers for Disease Control and Prevention. *Risk Factors for Diabetes-Related Complications*. 2020 June 30, 2020 [cited 2021 22 March]; Available from: <https://www.cdc.gov/diabetes/data/statistics-report/risks-complications.html>.
4. The Royal Australian College of General Practitioners, *Management of type 2 diabetes: A handbook for general practice*. 2020.
5. Diabetes Australia. *What Should I Eat?* 2020 [cited 2021 April 28]; Available from: <https://www.diabetesaustralia.com.au/food-activity/eating-well/what-should-i-eat/>.
6. McArdle, PD, Greenfield, SM, Rilstone, SK, et al., *Carbohydrate restriction for glycaemic control in Type 2 diabetes: a systematic review and meta-analysis*. Diabet Med, 2019. **36**(3): p. 335-348. <https://doi.org/10.1111/dme.13862>.
7. Dening, J and Islam, SMS, *Defining a low carbohydrate diet: Proposal for a standardized consensus of carbohydrate intake (Carb-Cal Model)*. Diabetes Res Clin Pract, 2020. **166**: p. 108284. <https://doi.org/10.1016/j.diabres.2020.108284>.
8. Huntriss, R, Campbell, M, and Bedwell, C, *The interpretation and effect of a low-carbohydrate diet in the management of type 2 diabetes: a systematic review and meta-analysis of randomised controlled trials*. Eur J Clin Nutr, 2018. **72**(3): p. 311-325. <https://doi.org/10.1038/s41430-017-0019-4>.
9. Goldenberg, JZ, Day, A, Brinkworth, GD, et al., *Efficacy and safety of low and very low carbohydrate diets for type 2 diabetes remission: systematic review and meta-analysis of published and unpublished randomized trial data*. BMJ, 2021. **372**: p. m4743. <https://doi.org/10.1136/bmj.m4743>.
10. Sainsbury, E, Kizirian, NV, Partridge, SR, et al., *Effect of dietary carbohydrate restriction on glycemic control in adults with diabetes: A systematic review and meta-analysis*. Diabetes Res Clin Pract, 2018. **139**: p. 239-252. <https://doi.org/10.1016/j.diabres.2018.02.026>.
11. Snorgaard, O, Poulsen, GM, Andersen, HK, et al., *Systematic review and meta-analysis of dietary carbohydrate restriction in patients with type 2 diabetes*. BMJ Open Diabetes Res Care, 2017. **5**(1): p. e000354. <https://doi.org/10.1136/bmjdr-2016-000354>.
12. Australian Diabetes Educators Association. *Workforce in Diabetes Education*. 2019 [cited 2019 19 August]; Available from: <https://members.adea.com.au/resources-2/workforce-in-diabetes-education/>.
13. Kennedy, M and Dunning, T, *Diabetes education: Essential but underfunded in Australia*. Diabetes & Primary Care Australia, 2017. **2**(1): p. 10-4.
14. Odgers-Jewell, K, Isenring, EA, Thomas, R, et al., *Group-based education for patients with type 2 diabetes: a survey of Australian dietitians*. Aust J Prim Health, 2017. **23**(4): p. 364-372. <https://doi.org/10.1071/PY16156>.
15. Karekla, M, Kasinopoulos, O, Neto, DD, et al., *Best Practices and Recommendations for Digital Interventions to Improve Engagement and Adherence in Chronic Illness Sufferers*. European Psychologist, 2019. **24**(1): p. 49-67. <https://doi.org/10.1027/1016-9040/a000349>.
16. Cottrez, AP, Durant, N, Agne, AA, et al., *Internet interventions to support lifestyle modification for diabetes management: a systematic review of the evidence*. J Diabetes Complications, 2014. **28**(2): p. 243-51. <https://doi.org/10.1016/j.jdiacomp.2013.07.003>.
17. Pereira, K, Phillips, B, Johnson, C, et al., *Internet delivered diabetes self-management education: a review*. Diabetes Technol Ther, 2015. **17**(1): p. 55-63. <https://doi.org/10.1089/dia.2014.0155>.

18. Kebede, MM, Zeeb, H, Peters, M, et al., *Effectiveness of Digital Interventions for Improving Glycemic Control in Persons with Poorly Controlled Type 2 Diabetes: A Systematic Review, Meta-analysis, and Meta-regression Analysis*. *Diabetes Technol Ther*, 2018. **20**(11): p. 767-782. <https://doi.org/10.1089/dia.2018.0216>.
19. Dening, J, Islam, SMS, George, E, et al., *Web-Based Interventions for Dietary Behavior in Adults With Type 2 Diabetes: Systematic Review of Randomized Controlled Trials*. *J Med Internet Res*, 2020. **22**(8): p. e16437. <https://doi.org/10.2196/16437>.
20. Murray, E, Sweeting, M, Dack, C, et al., *Web-based self-management support for people with type 2 diabetes (HeLP-Diabetes): randomised controlled trial in English primary care*. *BMJ Open*, 2017. **7**(9). <https://doi.org/10.1136/bmjopen-2017-016009>.
21. Ross, J, Stevenson, F, Dack, C, et al., *Developing an implementation strategy for a digital health intervention: an example in routine healthcare*. *BMC Health Serv Res*, 2018. **18**(1): p. 794. <https://doi.org/10.1186/s12913-018-3615-7>.
22. National Diabetes Service Scheme. *Diabetes data snapshots: Type 2 diabetes - March 2021*. 2021 [cited 2021 April 28]; Available from: <https://www.ndss.com.au/about-the-ndss/diabetes-facts-and-figures/diabetes-data-snapshots/>.
23. Young-Hyman, DL and Davis, CL, *Disordered eating behavior in individuals with diabetes: importance of context, evaluation, and classification*. *Diabetes Care*, 2010. **33**(3): p. 683-9. <https://doi.org/10.2337/dc08-1077>.
24. Garner, D, Olmsted, M, Bohr, Y, et al., *The eating attitudes test: psychometric features and clinical correlates*. *Psychol Med*, 1982. **12**(4): p. 871-8. <https://doi.org/10.1017/s0033291700049163>.
25. The Butterfly Foundation. *Talking helps. Butterfly National Helpline*. 2021; Available from: <https://butterfly.org.au/Get%20Support/Helpline/>.
26. Michie, S, Richardson, M, Johnston, M, et al., *The behavior change technique taxonomy (v1) of 93 hierarchically clustered techniques: building an international consensus for the reporting of behavior change interventions*. *Ann Behav Med*, 2013. **46**(1): p. 81-95. <https://doi.org/10.1007/s12160-013-9486-6>.
27. Bandura, A, *Self-efficacy: The exercise of control*. 9th ed. 1997, New York: W.H Freeman and Company.
28. Indelicato, L, Dauriz, M, Santi, L, et al., *Psychological distress, self-efficacy and glycemic control in type 2 diabetes*. *Nutr Metab Cardiovasc Dis*, 2017. **27**(4): p. 300-306. <https://doi.org/10.1016/j.numecd.2017.01.006>.
29. Brown, SA, Garcia, AA, Brown, A, et al., *Biobehavioral determinants of glycemic control in type 2 diabetes: A systematic review and meta-analysis*. *Patient Educ Couns*, 2016. **99**(10): p. 1558-67. <https://doi.org/10.1016/j.pec.2016.03.020>.
30. Ouyang, CM, Dwyer, JT, Jacques, PF, et al., *Determinants of dietary self-care behaviours among Taiwanese patients with type 2 diabetes*. *Asia Pac J Clin Nutr*, 2015. **24**(3): p. 430-7. <https://doi.org/10.6133/apjcn.2015.24.3.02>.
31. Strychar, I, Elisha, B, and Schmitz, N, *Type 2 Diabetes Self-Management: Role of Diet Self-Efficacy*. *Canadian Journal of Diabetes*, 2012. **36**(6): p. 337-344. <https://doi.org/10.1016/j.jcjd.2012.10.005>.
32. Paragas, ED, Jr. and Barcelo, TI, *Effects of message-framed informational videos on diabetes management knowledge and self-efficacy*. *Int J Nurs Pract*, 2019. **25**(4): p. e12737. <https://doi.org/10.1111/ijn.12737>.

- 1  
2  
3  
4  
5  
6  
7  
8  
9  
10  
11  
12  
13  
14  
15  
16  
17  
18  
19  
20  
21  
22  
23  
24  
25  
26  
27  
28  
29  
30  
31  
32  
33  
34  
35  
36  
37  
38  
39  
40  
41  
42  
43  
44  
45  
46  
47  
48  
49  
50  
51  
52  
53  
54  
55  
56  
57  
58  
59  
60
33. Gans, KM, Risica, PM, Dulin-Keita, A, et al., *Innovative video tailoring for dietary change: final results of the Good for you! cluster randomized trial*. *Int J Behav Nutr Phys Act*, 2015. **12**: p. 130. <https://doi.org/10.1186/s12966-015-0282-5>.
  34. Kelders, SM, Kok, RN, Ossebaard, HC, et al., *Persuasive system design does matter: a systematic review of adherence to web-based interventions*. *J Med Internet Res*, 2012. **14**(6): p. e152. <https://doi.org/10.2196/jmir.2104>.
  35. National Health and Medical Research Council, *Australian Dietary Guidelines*. 2013: Canberra.
  36. Turton, J, Brinkworth, GD, Field, R, et al., *An evidence-based approach to developing low-carbohydrate diets for type 2 diabetes management: A systematic review of interventions and methods*. *Diabetes Obes Metab*, 2019. **21**(11): p. 2513-2525. <https://doi.org/10.1111/dom.13837>.
  37. Unwin, D, Khalid, AA, Unwin, J, et al., *Insights from a general practice service evaluation supporting a lower carbohydrate diet in patients with type 2 diabetes mellitus and prediabetes: a secondary analysis of routine clinic data including HbA1c, weight and prescribing over 6 years*. *BMJ Nutrition, Prevention & Health*, 2020. <https://doi.org/10.1136/bmjnph-2020-000072>.
  38. U.S. Department of Health and Human Services and U.S. Department of Agriculture, *Dietary Guidelines for Americans*. 2015-2020(December 2015).
  39. Sucher, S, Markova, M, Hornemann, S, et al., *Comparison of the effects of diets high in animal or plant protein on metabolic and cardiovascular markers in type 2 diabetes: A randomized clinical trial*. *Diabetes Obes Metab*, 2017. **19**(7): p. 944-952. <https://doi.org/10.1111/dom.12901>.
  40. Gannon, M and Nuttall, F, *Effect of a High-Protein, Low-Carbohydrate Diet on Blood Glucose Control in People With Type 2 Diabetes*. *Diabetes*, 2004. **53**(9): p. 2375-2382. <https://doi.org/10.2337/diabetes.53.9.2375>.
  41. Pedersen, E, Jesudason, DR, and Clifton, PM, *High protein weight loss diets in obese subjects with type 2 diabetes mellitus*. *Nutr Metab Cardiovasc Dis*, 2014. **24**(5): p. 554-62. <https://doi.org/10.1016/j.numecd.2013.11.003>.
  42. Heart Foundation. *Dairy & Heart Healthy Eating*. 2019 [cited 2021 April 28]; Available from: [https://www.heartfoundation.org.au/getmedia/b7f8c612-c1eb-4139-b4b1-898d8302d234/Nutrition\\_Position\\_Statement\\_-\\_DAIRY.pdf](https://www.heartfoundation.org.au/getmedia/b7f8c612-c1eb-4139-b4b1-898d8302d234/Nutrition_Position_Statement_-_DAIRY.pdf).
  43. Pal, K, Dack, C, Ross, J, et al., *Digital Health Interventions for Adults With Type 2 Diabetes: Qualitative Study of Patient Perspectives on Diabetes Self-Management Education and Support*. *J Med Internet Res.*, 2018. **2**(20): p. e40. <https://doi.org/10.2196/jmir.8439>.
  44. Abu Abed, M, Himmel, W, Vormfelde, S, et al., *Video-assisted patient education to modify behavior: a systematic review*. *Patient Educ Couns*, 2014. **97**(1): p. 16-22. <https://doi.org/10.1016/j.pec.2014.06.015>.
  45. Desroches, S, Lapointe, A, Ratté, S, et al., *Interventions to enhance adherence to dietary advice for preventing and managing chronic diseases in adults*. *Cochrane Database of Systematic Reviews*, 2013. <https://doi.org/10.1002/14651858.CD008722.pub2>.
  46. LeRouge, C and Wickramasinghe, N, *A Review of User-Centered Design for Diabetes-Related Consumer Health Informatics Technologies*. *J Diabetes Sci Technol*, 2013. **7**(4).
  47. Churuangasuk, C, Lean, MEJ, and Combet, E, *Lower carbohydrate and higher fat intakes are associated with higher hemoglobin A1c: findings from the UK National Diet and Nutrition*

- 1  
2  
3 Survey 2008-2016. *Eur J Nutr*, 2020. **59**(6): p. 2771-2782. <https://doi.org/10.1007/s00394-019-02122-1>.
- 4  
5  
6 48. Creswell, J, *A Concise Introduction to Mixed Methods Research*. 2015, California: Sage Publications.
- 7  
8 49. Short, CE, DeSmet, A, Woods, C, et al., *Measuring Engagement in eHealth and mHealth Behavior Change Interventions: Viewpoint of Methodologies*. 2018.
- 9  
10 <https://doi.org/10.2196/preprints.9397>.
- 11  
12 50. O'Brien, HL, Cairns, P, and Hall, M, *A practical approach to measuring user engagement with the refined user engagement scale (UES) and new UES short form*. *International Journal of Human-Computer Studies*, 2018. **112**: p. 28-39. <https://doi.org/10.1016/j.ijhcs.2018.01.004>.
- 13  
14  
15 51. Morville, P. *User Experience Honeycomb*. 2016; Available from:
- 16 <https://intertwined.org/user-experience-honeycomb/>.
- 17  
18 52. University of Waterloo. *User Experience Design for Learning (UXDL)*. 2021 [cited 2021 April 28]; Available from: <https://cms.cel.uwaterloo.ca/honeycomb/index.aspx>.
- 19  
20 53. Braun, V and Clarke, V, *To saturate or not to saturate? Questioning data saturation as a useful concept for thematic analysis and sample-size rationales*. *Qualitative Research in Sport, Exercise and Health*, 2019. **13**(2): p. 201-216.
- 21  
22 <https://doi.org/10.1080/2159676x.2019.1704846>.
- 23  
24 54. McDowell, JC, M. Edwards, H. Shortridge-Baggett, L. , *Validation of the Australian/English version of the Diabetes Management Self-Efficacy Scale*. *International Journal of Nursing Practice*, 2005. **11**: p. 177–184. <https://doi.org/10.1111/j.1440-172x.2005.00518.x>.
- 25  
26  
27 55. Heintjes, E, Penning-van Beest, FP, SV , Grandy, S, et al., *Population attributable risk (PAR) of macrovascular events associated with HbA1c, blood pressure or weight in patients with type 2 diabetes mellitus: Evidence from a dutch cohort*. *Value in Health*, 2011. **14**: p. A233-A510. <https://doi.org/10.1016/j.jval.2011.08.754>.
- 28  
29  
30 56. Khaw, K, Wareham, N, Luben, R, et al., *Glycated haemoglobin, diabetes, and mortality in men in Norfolk cohort of European Prospective Investigation of Cancer and Nutrition (EPIC-Norfolk)*. *BMJ*, 2001. **322**: p. 1-6. <https://doi.org/10.1136/bmj.322.7277.15>.
- 31  
32  
33 57. Yamada, Y, Uchida, J, Izumi, H, et al., *A Non-calorie-restricted Low-carbohydrate Diet is Effective as an Alternative Therapy for Patients with Type 2 Diabetes*. *Internal Medicine*, 2014. **53**(1): p. 13-19. <https://doi.org/10.2169/internalmedicine.53.0861>.
- 34  
35  
36  
37 58. Jonasson, L, Guldbbrand, H, Lundberg, AK, et al., *Advice to follow a low-carbohydrate diet has a favourable impact on low-grade inflammation in type 2 diabetes compared with advice to follow a low-fat diet*. *Ann Med*, 2014. **46**(3): p. 182-7.
- 38  
39 <https://doi.org/10.3109/07853890.2014.894286>.
- 40  
41  
42 59. Clifton, PM, Coles, LT, and Galbraith, CE, *Low Carbohydrate Diets in Type 2 Diabetes—A Translational Study*. *Journal of Diabetes Mellitus*, 2016. **06**(02): p. 152-157.
- 43  
44 <https://doi.org/10.4236/jdm.2016.62016>.
- 45  
46  
47 60. Jahangiry, LS, D. Montazeri, A. Najafi, M. Mohammed, K. Yaseri M. , *Adherence and Attrition in a Web-Based Lifestyle Intervention for People with Metabolic Syndrome*. *Iranian J Publ Health*, 2014. **43**(9): p. 1248-1258.
- 48  
49  
50 61. Ramadas, A, Chan, CKY, Oldenburg, B, et al., *Randomised-controlled trial of a web-based dietary intervention for patients with type 2 diabetes: changes in health cognitions and glycaemic control*. *BMC Public Health*, 2018. **18**(1): p. 716. <https://doi.org/10.1186/s12889-018-5640-1>.
- 51  
52  
53  
54  
55  
56  
57  
58  
59  
60

- 1  
2  
3 62. National Cancer Institute. *Dietary Assessment Primer*. 2020; Available from:  
4 <https://dietassessmentprimer.cancer.gov/>.  
5  
6 63. Pursey, K, Burrows, TL, Stanwell, P, et al., *How accurate is web-based self-reported height,*  
7 *weight, and body mass index in young adults?* J Med Internet Res, 2014. **16**(1): p. e4.  
8 <https://doi.org/10.2196/jmir.2909>.  
9  
10 64. National Health and Medical Research Council, *The Australian Code for the Responsible*  
11 *Conduct of Research*. 2018: Canberra.  
12  
13 65. National Health and Medical Research Council, *Publication and dissemination of research: a*  
14 *guide supporting the Australian Code for the Responsible Conduct of Research*. 2020:  
15 Canberra.  
16  
17 66. Agency of Healthcare Research and Quality. *Communication and Dissemination Strategies*  
18 *To Facilitate the Use of Health and Health Care Evidence*. 2012; Available from:  
19 [https://effectivehealthcare.ahrq.gov/sites/default/files/pdf/medical-evidence-](https://effectivehealthcare.ahrq.gov/sites/default/files/pdf/medical-evidence-communication_research-protocol.pdf)  
20 [communication\\_research-protocol.pdf](https://effectivehealthcare.ahrq.gov/sites/default/files/pdf/medical-evidence-communication_research-protocol.pdf).  
21  
22 67. Ross-Hellauer, T, Tennant, JP, Banelyte, V, et al., *Ten simple rules for innovative*  
23 *dissemination of research*. PLoS Comput Biol, 2020. **16**(4): p. e1007704.  
24 <https://doi.org/10.1371/journal.pcbi.1007704>.  
25  
26  
27  
28  
29  
30  
31  
32  
33  
34  
35  
36  
37  
38  
39  
40  
41  
42  
43  
44  
45  
46  
47  
48  
49  
50  
51  
52  
53  
54  
55  
56  
57  
58  
59  
60



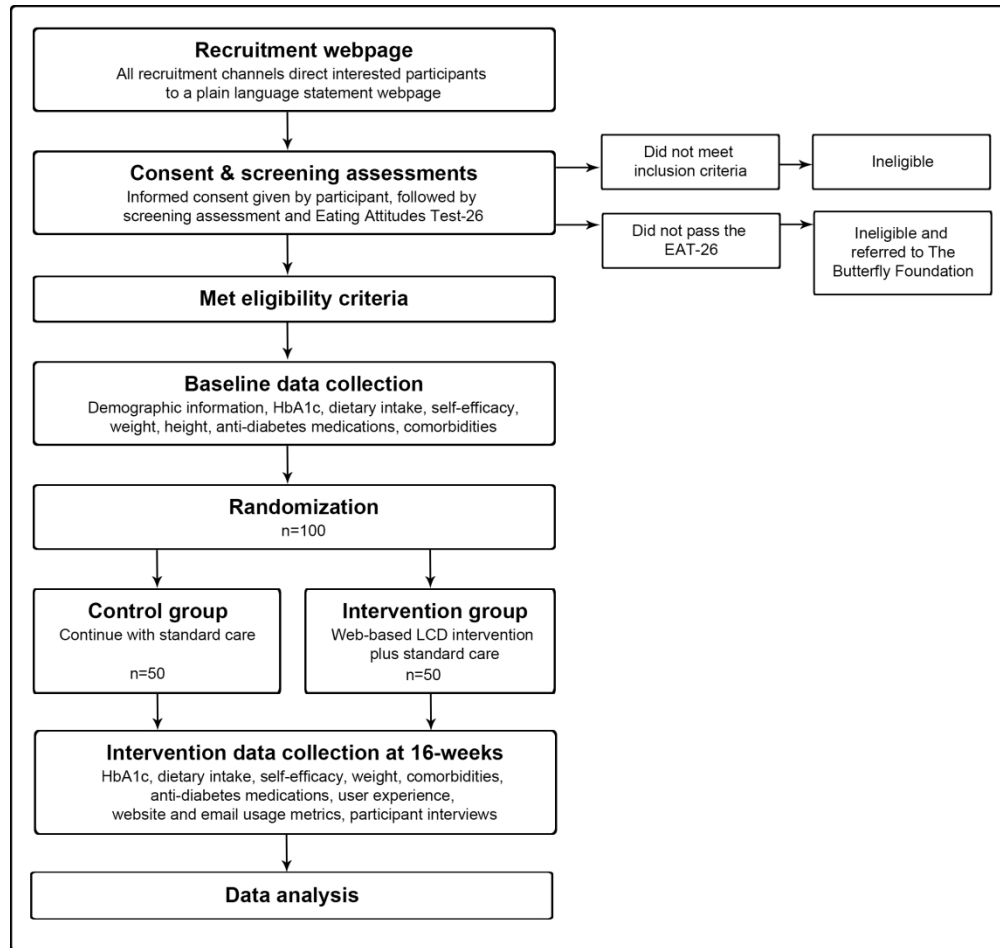

Study flow chart

201x190mm (300 x 300 DPI)

## Week 2 Modules

T2Diet guidelines recap Benefits of fibre Understanding T2D Healthy blood sugar Recipe suggestions Action steps

## Week 2. T2Diet Guidelines Recap (Video - 3:41 minutes)

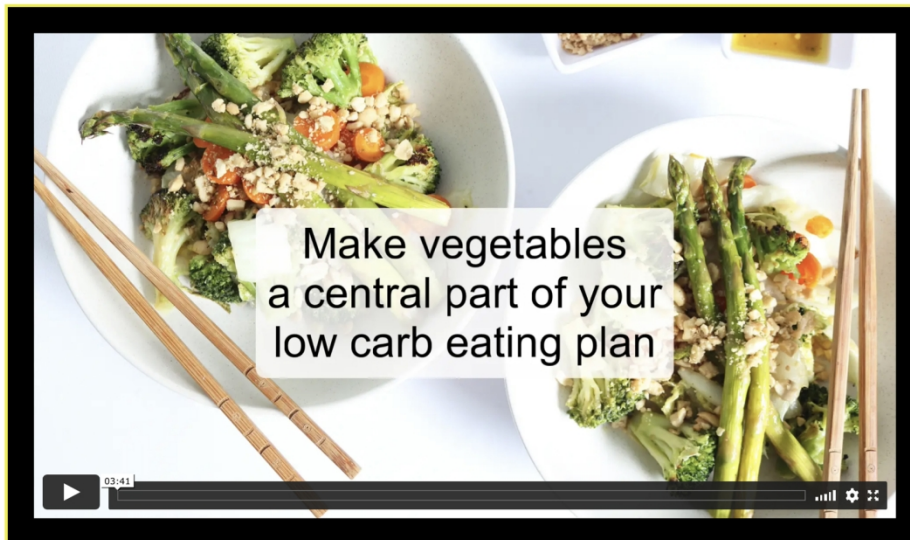

## Brief overview

**2 Essential Rules to Follow****Rule #1: Eat Nutrient Dense Real Food**

This means avoiding processed foods as much as possible and choosing fresh foods that contain more nutrients to help improve your health.

**Rule #2: Avoid or Minimise Sugar & Starchy Foods**

Sugar: many packaged food products contain high amounts of added sugar. Many beverages also contain a lot of sugar, including fruit juice which contains high amounts of naturally occurring sugar.

Starchy foods: potatoes, sweet potatoes, corn, bread, rice, pasta, noodles, cereals, flour and flour-based products.

Presentation format of the weekly behavior change modules

324x372mm (144 x 144 DPI)

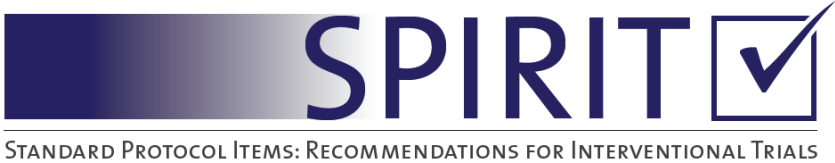

SPIRIT 2013 Checklist: Recommended items to address in a clinical trial protocol and related documents\*

| Section/item                      | Item No | Description                                                                                                                                                                                                                                                                              | Addressed on page number |
|-----------------------------------|---------|------------------------------------------------------------------------------------------------------------------------------------------------------------------------------------------------------------------------------------------------------------------------------------------|--------------------------|
| <b>Administrative information</b> |         |                                                                                                                                                                                                                                                                                          |                          |
| Title                             | 1       | Descriptive title identifying the study design, population, interventions, and, if applicable, trial acronym                                                                                                                                                                             | ___1___                  |
| Trial registration                | 2a      | Trial identifier and registry name. If not yet registered, name of intended registry                                                                                                                                                                                                     | ___2___                  |
|                                   | 2b      | All items from the World Health Organization Trial Registration Data Set                                                                                                                                                                                                                 | ___NA___                 |
| Protocol version                  | 3       | Date and version identifier                                                                                                                                                                                                                                                              | ___NA___                 |
| Funding                           | 4       | Sources and types of financial, material, and other support                                                                                                                                                                                                                              | ___16___                 |
| Roles and responsibilities        | 5a      | Names, affiliations, and roles of protocol contributors                                                                                                                                                                                                                                  | ___1___                  |
|                                   | 5b      | Name and contact information for the trial sponsor                                                                                                                                                                                                                                       | ___1___                  |
|                                   | 5c      | Role of study sponsor and funders, if any, in study design; collection, management, analysis, and interpretation of data; writing of the report; and the decision to submit the report for publication, including whether they will have ultimate authority over any of these activities | ___NA___                 |
|                                   | 5d      | Composition, roles, and responsibilities of the coordinating centre, steering committee, endpoint adjudication committee, data management team, and other individuals or groups overseeing the trial, if applicable (see Item 21a for data monitoring committee)                         | ___14___                 |

1 **Introduction**

2

3 Background and 6a Description of research question and justification for undertaking the trial, including summary of relevant \_\_\_ 3-4 \_\_\_  
 4 rationale studies (published and unpublished) examining benefits and harms for each intervention  
 5

6 6b Explanation for choice of comparators \_\_\_ 3-4 \_\_\_  
 7

8 Objectives 7 Specific objectives or hypotheses \_\_\_ 4 \_\_\_  
 9

10 Trial design 8 Description of trial design including type of trial (eg, parallel group, crossover, factorial, single group),  
 11 allocation ratio, and framework (eg, superiority, equivalence, noninferiority, exploratory) \_\_\_ 4 \_\_\_  
 12  
 13

14 **Methods: Participants, interventions, and outcomes**

15

16 Study setting 9 Description of study settings (eg, community clinic, academic hospital) and list of countries where data will \_\_\_ 4, 11 \_\_\_  
 17 be collected. Reference to where list of study sites can be obtained  
 18

19 Eligibility criteria 10 Inclusion and exclusion criteria for participants. If applicable, eligibility criteria for study centres and \_\_\_ 5 \_\_\_  
 20 individuals who will perform the interventions (eg, surgeons, psychotherapists)  
 21

22 Interventions 11a Interventions for each group with sufficient detail to allow replication, including how and when they will be \_\_\_ 6-8 \_\_\_  
 23 administered  
 24

25 11b Criteria for discontinuing or modifying allocated interventions for a given trial participant (eg, drug dose \_\_\_ NA \_\_\_  
 26 change in response to harms, participant request, or improving/worsening disease)  
 27

28 11c Strategies to improve adherence to intervention protocols, and any procedures for monitoring adherence \_\_\_ 7-8 \_\_\_  
 29 (eg, drug tablet return, laboratory tests)  
 30

31 11d Relevant concomitant care and interventions that are permitted or prohibited during the trial \_\_\_ NA \_\_\_  
 32

33 Outcomes 12 Primary, secondary, and other outcomes, including the specific measurement variable (eg, systolic blood  
 34 pressure), analysis metric (eg, change from baseline, final value, time to event), method of aggregation (eg, \_\_\_ 9-10 \_\_\_  
 35 median, proportion), and time point for each outcome. Explanation of the clinical relevance of chosen  
 36 efficacy and harm outcomes is strongly recommended  
 37

38 Participant timeline 13 Time schedule of enrolment, interventions (including any run-ins and washouts), assessments, and visits for \_\_\_ 10, 11 \_\_\_  
 39 participants. A schematic diagram is highly recommended (see Figure)  
 40  
 41  
 42

1 Sample size 14 Estimated number of participants needed to achieve study objectives and how it was determined, including \_\_\_\_\_ 11 \_\_\_\_\_  
 2 clinical and statistical assumptions supporting any sample size calculations

4 Recruitment 15 Strategies for achieving adequate participant enrolment to reach target sample size \_\_\_\_\_ 11 \_\_\_\_\_

7 **Methods: Assignment of interventions (for controlled trials)**

9 Allocation:

11 Sequence 16a Method of generating the allocation sequence (eg, computer-generated random numbers), and list of any \_\_\_\_\_ 12 \_\_\_\_\_  
 12 generation factors for stratification. To reduce predictability of a random sequence, details of any planned restriction  
 13 (eg, blocking) should be provided in a separate document that is unavailable to those who enrol participants  
 14 or assign interventions

17 Allocation 16b Mechanism of implementing the allocation sequence (eg, central telephone; sequentially numbered, \_\_\_\_\_ 11-12 \_\_\_\_\_  
 18 concealment opaque, sealed envelopes), describing any steps to conceal the sequence until interventions are assigned  
 19 mechanism

21 Implementation 16c Who will generate the allocation sequence, who will enrol participants, and who will assign participants to \_\_\_\_\_ 11-12 \_\_\_\_\_  
 22 interventions

24 Blinding (masking) 17a Who will be blinded after assignment to interventions (eg, trial participants, care providers, outcome \_\_\_\_\_ 11-12 \_\_\_\_\_  
 25 assessors, data analysts), and how

27 17b If blinded, circumstances under which unblinding is permissible, and procedure for revealing a participant's \_\_\_\_\_ NA \_\_\_\_\_  
 28 allocated intervention during the trial

31 **Methods: Data collection, management, and analysis**

33 Data collection 18a Plans for assessment and collection of outcome, baseline, and other trial data, including any related \_\_\_\_\_ 12 \_\_\_\_\_  
 34 methods processes to promote data quality (eg, duplicate measurements, training of assessors) and a description of  
 35 study instruments (eg, questionnaires, laboratory tests) along with their reliability and validity, if known.  
 36 Reference to where data collection forms can be found, if not in the protocol

39 18b Plans to promote participant retention and complete follow-up, including list of any outcome data to be \_\_\_\_\_ 13 \_\_\_\_\_  
 40 collected for participants who discontinue or deviate from intervention protocols

|    |                                 |     |                                                                                                                                                                                                                                                                                                                                       |          |
|----|---------------------------------|-----|---------------------------------------------------------------------------------------------------------------------------------------------------------------------------------------------------------------------------------------------------------------------------------------------------------------------------------------|----------|
| 1  | Data management                 | 19  | Plans for data entry, coding, security, and storage, including any related processes to promote data quality (eg, double data entry; range checks for data values). Reference to where details of data management procedures can be found, if not in the protocol                                                                     | ___13___ |
| 2  |                                 |     |                                                                                                                                                                                                                                                                                                                                       |          |
| 3  |                                 |     |                                                                                                                                                                                                                                                                                                                                       |          |
| 4  |                                 |     |                                                                                                                                                                                                                                                                                                                                       |          |
| 5  | Statistical methods             | 20a | Statistical methods for analysing primary and secondary outcomes. Reference to where other details of the statistical analysis plan can be found, if not in the protocol                                                                                                                                                              | ___14___ |
| 6  |                                 |     |                                                                                                                                                                                                                                                                                                                                       |          |
| 7  |                                 |     |                                                                                                                                                                                                                                                                                                                                       |          |
| 8  |                                 | 20b | Methods for any additional analyses (eg, subgroup and adjusted analyses)                                                                                                                                                                                                                                                              | ___14___ |
| 9  |                                 |     |                                                                                                                                                                                                                                                                                                                                       |          |
| 10 |                                 | 20c | Definition of analysis population relating to protocol non-adherence (eg, as randomised analysis), and any statistical methods to handle missing data (eg, multiple imputation)                                                                                                                                                       | ___14___ |
| 11 |                                 |     |                                                                                                                                                                                                                                                                                                                                       |          |
| 12 |                                 |     |                                                                                                                                                                                                                                                                                                                                       |          |
| 13 |                                 |     |                                                                                                                                                                                                                                                                                                                                       |          |
| 14 | <b>Methods: Monitoring</b>      |     |                                                                                                                                                                                                                                                                                                                                       |          |
| 15 |                                 |     |                                                                                                                                                                                                                                                                                                                                       |          |
| 16 | Data monitoring                 | 21a | Composition of data monitoring committee (DMC); summary of its role and reporting structure; statement of whether it is independent from the sponsor and competing interests; and reference to where further details about its charter can be found, if not in the protocol. Alternatively, an explanation of why a DMC is not needed | ___13___ |
| 17 |                                 |     |                                                                                                                                                                                                                                                                                                                                       |          |
| 18 |                                 |     |                                                                                                                                                                                                                                                                                                                                       |          |
| 19 |                                 |     |                                                                                                                                                                                                                                                                                                                                       |          |
| 20 |                                 |     |                                                                                                                                                                                                                                                                                                                                       |          |
| 21 |                                 |     |                                                                                                                                                                                                                                                                                                                                       |          |
| 22 |                                 | 21b | Description of any interim analyses and stopping guidelines, including who will have access to these interim results and make the final decision to terminate the trial                                                                                                                                                               | ___NA___ |
| 23 |                                 |     |                                                                                                                                                                                                                                                                                                                                       |          |
| 24 |                                 |     |                                                                                                                                                                                                                                                                                                                                       |          |
| 25 | Harms                           | 22  | Plans for collecting, assessing, reporting, and managing solicited and spontaneously reported adverse events and other unintended effects of trial interventions or trial conduct                                                                                                                                                     | ___7___  |
| 26 |                                 |     |                                                                                                                                                                                                                                                                                                                                       |          |
| 27 |                                 |     |                                                                                                                                                                                                                                                                                                                                       |          |
| 28 | Auditing                        | 23  | Frequency and procedures for auditing trial conduct, if any, and whether the process will be independent from investigators and the sponsor                                                                                                                                                                                           | ___13___ |
| 29 |                                 |     |                                                                                                                                                                                                                                                                                                                                       |          |
| 30 |                                 |     |                                                                                                                                                                                                                                                                                                                                       |          |
| 31 |                                 |     |                                                                                                                                                                                                                                                                                                                                       |          |
| 32 | <b>Ethics and dissemination</b> |     |                                                                                                                                                                                                                                                                                                                                       |          |
| 33 |                                 |     |                                                                                                                                                                                                                                                                                                                                       |          |
| 34 | Research ethics approval        | 24  | Plans for seeking research ethics committee/institutional review board (REC/IRB) approval                                                                                                                                                                                                                                             | ___14___ |
| 35 |                                 |     |                                                                                                                                                                                                                                                                                                                                       |          |
| 36 |                                 |     |                                                                                                                                                                                                                                                                                                                                       |          |
| 37 | Protocol amendments             | 25  | Plans for communicating important protocol modifications (eg, changes to eligibility criteria, outcomes, analyses) to relevant parties (eg, investigators, REC/IRBs, trial participants, trial registries, journals, regulators)                                                                                                      | ___14___ |
| 38 |                                 |     |                                                                                                                                                                                                                                                                                                                                       |          |
| 39 |                                 |     |                                                                                                                                                                                                                                                                                                                                       |          |
| 40 |                                 |     |                                                                                                                                                                                                                                                                                                                                       |          |
| 41 |                                 |     |                                                                                                                                                                                                                                                                                                                                       |          |
| 42 |                                 |     |                                                                                                                                                                                                                                                                                                                                       |          |
| 43 |                                 |     |                                                                                                                                                                                                                                                                                                                                       |          |
| 44 |                                 |     |                                                                                                                                                                                                                                                                                                                                       |          |
| 45 |                                 |     |                                                                                                                                                                                                                                                                                                                                       |          |
| 46 |                                 |     |                                                                                                                                                                                                                                                                                                                                       |          |

|    |                               |     |                                                                                                                                                                                                                                                                                     |                  |
|----|-------------------------------|-----|-------------------------------------------------------------------------------------------------------------------------------------------------------------------------------------------------------------------------------------------------------------------------------------|------------------|
| 1  | Consent or assent             | 26a | Who will obtain informed consent or assent from potential trial participants or authorised surrogates, and how (see Item 32)                                                                                                                                                        | ___ 11 ___       |
| 2  |                               |     |                                                                                                                                                                                                                                                                                     |                  |
| 3  |                               |     |                                                                                                                                                                                                                                                                                     |                  |
| 4  |                               | 26b | Additional consent provisions for collection and use of participant data and biological specimens in ancillary studies, if applicable                                                                                                                                               | ___ NA ___       |
| 5  |                               |     |                                                                                                                                                                                                                                                                                     |                  |
| 6  |                               |     |                                                                                                                                                                                                                                                                                     |                  |
| 7  | Confidentiality               | 27  | How personal information about potential and enrolled participants will be collected, shared, and maintained in order to protect confidentiality before, during, and after the trial                                                                                                | ___ 13 ___       |
| 8  |                               |     |                                                                                                                                                                                                                                                                                     |                  |
| 9  |                               |     |                                                                                                                                                                                                                                                                                     |                  |
| 10 | Declaration of interests      | 28  | Financial and other competing interests for principal investigators for the overall trial and each study site                                                                                                                                                                       | ___ 16 ___       |
| 11 |                               |     |                                                                                                                                                                                                                                                                                     |                  |
| 12 |                               |     |                                                                                                                                                                                                                                                                                     |                  |
| 13 | Access to data                | 29  | Statement of who will have access to the final trial dataset, and disclosure of contractual agreements that limit such access for investigators                                                                                                                                     | ___ 13 ___       |
| 14 |                               |     |                                                                                                                                                                                                                                                                                     |                  |
| 15 |                               |     |                                                                                                                                                                                                                                                                                     |                  |
| 16 |                               |     |                                                                                                                                                                                                                                                                                     |                  |
| 17 | Ancillary and post-trial care | 30  | Provisions, if any, for ancillary and post-trial care, and for compensation to those who suffer harm from trial participation                                                                                                                                                       | ___ NA ___       |
| 18 |                               |     |                                                                                                                                                                                                                                                                                     |                  |
| 19 |                               |     |                                                                                                                                                                                                                                                                                     |                  |
| 20 | Dissemination policy          | 31a | Plans for investigators and sponsor to communicate trial results to participants, healthcare professionals, the public, and other relevant groups (eg, via publication, reporting in results databases, or other data sharing arrangements), including any publication restrictions | ___ 15 ___       |
| 21 |                               |     |                                                                                                                                                                                                                                                                                     |                  |
| 22 |                               |     |                                                                                                                                                                                                                                                                                     |                  |
| 23 |                               |     |                                                                                                                                                                                                                                                                                     |                  |
| 24 |                               | 31b | Authorship eligibility guidelines and any intended use of professional writers                                                                                                                                                                                                      | ___ NA ___       |
| 25 |                               |     |                                                                                                                                                                                                                                                                                     |                  |
| 26 |                               | 31c | Plans, if any, for granting public access to the full protocol, participant-level dataset, and statistical code                                                                                                                                                                     | ___ NA ___       |
| 27 |                               |     |                                                                                                                                                                                                                                                                                     |                  |
| 28 |                               |     |                                                                                                                                                                                                                                                                                     |                  |
| 29 | <b>Appendices</b>             |     |                                                                                                                                                                                                                                                                                     |                  |
| 30 |                               |     |                                                                                                                                                                                                                                                                                     |                  |
| 31 | Informed consent materials    | 32  | Model consent form and other related documentation given to participants and authorised surrogates                                                                                                                                                                                  | ___ Attached ___ |
| 32 |                               |     |                                                                                                                                                                                                                                                                                     |                  |
| 33 |                               |     |                                                                                                                                                                                                                                                                                     |                  |
| 34 | Biological specimens          | 33  | Plans for collection, laboratory evaluation, and storage of biological specimens for genetic or molecular analysis in the current trial and for future use in ancillary studies, if applicable                                                                                      | ___ NA ___       |
| 35 |                               |     |                                                                                                                                                                                                                                                                                     |                  |
| 36 |                               |     |                                                                                                                                                                                                                                                                                     |                  |

\*It is strongly recommended that this checklist be read in conjunction with the SPIRIT 2013 Explanation & Elaboration for important clarification on the items. Amendments to the protocol should be tracked and dated. The SPIRIT checklist is copyrighted by the SPIRIT Group under the Creative Commons [“Attribution-NonCommercial-NoDerivs 3.0 Unported”](https://creativecommons.org/licenses/by-nc-nd/3.0/) license.

1  
2  
3  
4  
5  
6  
7  
8  
9  
10  
11  
12  
13  
14  
15  
16  
17  
18  
19  
20  
21  
22  
23  
24  
25  
26  
27  
28  
29  
30  
31  
32  
33  
34  
35  
36  
37  
38  
39  
40  
41  
42  
43  
44  
45  
46  
47  
48  
49  
50  
51  
52  
53  
54  
55  
56  
57  
58  
59  
60

**PLAIN LANGUAGE STATEMENT AND CONSENT FORM**

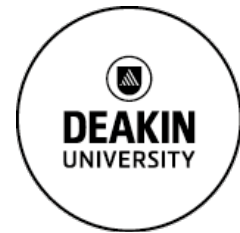

**TO: Participants**

**Plain Language Statement**

**Date:**

**Full Project Title: Web-based diet intervention for adults with type 2 diabetes**

**Principal Researcher: Dr Shariful Islam**

**Student Researcher: Jedha Dening**

**Associate Researcher(s): Professor Kylie Ball, Dr Elena George**

**Join this new study for adults with type 2 diabetes in Australia**

You are invited to participate in the 16-week T2Diet study—an evidence-based eating program for adults with type 2 diabetes.

The 16-week program is provided to you online so you can participate from home. Participation is voluntary. Participation is free.

| You can participate in this study if:                                                                                                                                                                                                                                                                                                                                                                                                                                                                                                                                                                                                                                                                         | You <b>CANNOT</b> participate in this study if:                                                                                                                                                                                                                                                                                                                                                                                                                                                                                                                                                                                                                                                                                                               |
|---------------------------------------------------------------------------------------------------------------------------------------------------------------------------------------------------------------------------------------------------------------------------------------------------------------------------------------------------------------------------------------------------------------------------------------------------------------------------------------------------------------------------------------------------------------------------------------------------------------------------------------------------------------------------------------------------------------|---------------------------------------------------------------------------------------------------------------------------------------------------------------------------------------------------------------------------------------------------------------------------------------------------------------------------------------------------------------------------------------------------------------------------------------------------------------------------------------------------------------------------------------------------------------------------------------------------------------------------------------------------------------------------------------------------------------------------------------------------------------|
| <ul style="list-style-type: none"> <li>You are an adult between 40-89 years with non-insulin-dependent type 2 diabetes</li> <li>If one of your HbA1c tests within the previous 6 months was equal to or above 7.0% / 53 mmol/mol</li> <li>Have an active email address</li> <li>Have access to a computer and the internet</li> <li>Are able to read and understand English</li> <li>Are located in Australia</li> <li>Are willing to use a finger-prick HbA1c self-test kit to take a blood sample at home (There will be no cost to you)</li> <li>Are willing to complete the required tests and questionnaires outlined below, which will help us make our scientific assessment of the program</li> </ul> | <ul style="list-style-type: none"> <li>You are a person with type 1 diabetes, prediabetes or gestational diabetes</li> <li>You have been diagnosed with renal disease or cardiovascular disease</li> <li>You have a disease or complication that may interfere with your participation, for example, cancer, proliferative retinopathy, or severe neuropathy.</li> <li>You are a woman who is pregnant or lactating</li> <li>You have undergone bariatric surgery</li> <li>You are vegetarian or vegan</li> <li>You are currently on a weight loss program or who have taken a weight loss program within the past 3 months</li> <li>You are currently enrolled in other clinical studies</li> <li>You have, or are at risk of, an eating disorder</li> </ul> |



Please view this entire page with information about the study. If you agree to participate, please click the button at the bottom of the page to complete the consent process.

### **Purpose of this study**

The purpose of this research is to determine whether the web-based T2Diet program is effective for helping adults with type 2 diabetes in Australia improve their eating plan and improve blood sugar levels.

### **Methods**

To help us determine the effectiveness of the web-based T2Diet program, we need to compare the changes in blood sugar levels in people who participate in the web-based T2Diet program, or in people who follow their standard care.

This means there will be two groups in this study:

**Group 1)** Will be allocated to the 16-week T2Diet program right away.

**Group 2)** Will be asked to continue with their standard care, however, you will be able to take the 16-week T2Diet program after the study is complete. This means Group 2 is on a 'waiting list' and will have to wait until after we've collected all the data from study participants before you are able to take the 16-week T2Diet program.

If you choose to participate, you could be allocated to Group 1 or Group 2. You can't choose which group to be in and you won't know up front. If you choose to join the study, you will be allocated to Group 1 or Group 2 randomly.

Regardless of which group you are allocated to, your participation is *very* important to help us determine whether this web-based eating program could be beneficial to support adults with type 2 diabetes in Australia to achieve better blood sugar control.

### **What your participation will involve**

When you join this study, you will be randomly allocated to Group 1 (T2Diet program right away) or Group 2 (wait list).

Both groups will be required to provide us with information to help us make our scientific assessments of the 16-week program. Your personal identity will remain confidential.

Please view the information below that explains each test or questionnaire we will ask you to do.

### **Eligibility/ Eating Attitudes Questionnaire**

Before entering the study, all participants will be required to confirm their eligibility by taking a short questionnaire, along with an Eating Attitudes Questionnaire

These two questionnaires will take approximately 10 minutes. You will be asked to complete these questionnaires via an online form after you provide your consent to participate.

### **Demographic information**

We will ask you to complete an online form to provide demographic information such as age, gender, duration of diabetes, family history of diabetes, country of birth, employment status, highest level of education, relationship status, current medication, smoking status, and existing health conditions.

1 This questionnaire takes 5-10 minutes. You will only need to take this questionnaire once at the  
2 beginning of the study. At the end of the study, we will only ask you about your current medication  
3 and health conditions. Your personal identity always remains confidential.  
4

### 5 **HbA1c to measure your blood sugar levels**

6

7 We will send you a HbA1c self-test kit that you can use at home to take a blood sample. We will need  
8 to provide the test company with your personal details (name, DOB, phone, address, email, gender)  
9 so they can ship the test kit to you.  
10

11  
12 The HbA1c test will involve following the instructions provided to take a finger-prick blood sample.  
13 After you take the blood sample, you will need to return it to the pathology lab within 24-hours in  
14 the reply-paid envelope provided.  
15

16 This is the most important test as it will help us determine any changes in your blood sugar levels  
17 over time. You would need to return the test kit to the lab in the reply-paid envelope within 24-hours  
18 after taking your blood sample. We will test your HbA1c before participating in the study and 16  
19 weeks later (2 tests). There will be no cost to you.  
20

### 21 **Report your food and beverage intake over a 24-hour period**

22

23 We'll ask you to complete an online guided questionnaire that will prompt you to enter all the foods  
24 and beverages you consumed in a 24-hour period, including listing any supplements you take.  
25

26 This questionnaire takes 30 minutes. It is the longest test you will need to take for the study.  
27

28 If there are missing entries or details from your food diary that need to be clarified, the researchers  
29 or their research assistant may contact you via phone or email.  
30

31 We will ask you to take the food questionnaire 2 times, before participating in the study and 16  
32 weeks later.  
33

### 34 **Report your weight and height**

35

36 We ask you to complete an online form so you can share both your weight and height.  
37

38 We will ask you to report your height in centimetres and your body weight in kg.  
39

40 This self-report will take 5 minutes.  
41

42 We will ask you to report your height 1 time and weight 2 times, before participating in the study and  
43 16 weeks later.  
44

### 45 **Take a diabetes management questionnaire**

46

47 This questionnaire asks you about a range of factors related to your diabetes management.  
48

49 This questionnaire takes 5-10 minutes.  
50

51 We will ask you to take the diabetes management questionnaire 2 times, before participating in the  
52 study and 16 weeks later.  
53

## Share your experience of participation (Group 1 only)

We will ask you to complete an online questionnaire where you can use a scale to rate your experience of using the program and website.

This questionnaire takes 5-10 minutes.

We only ask participants in Group 1 to complete this at the end of the study.

## Join a phone interview after the study (Group 1 only - OPTIONAL)

After the study we are interested to interview participants in Group 1 to learn more about their experience during the T2Diet study. This would involve joining a 20-30 minute phone interview with a researcher who will ask you a series of questions.

We will take an audio recording of the phone interview so we don't forget anything that you said and can refer to the recordings later. The audio recordings will then be transcribed and used to help us learn about your experience in the study. Your comments may be used to publish study results but your identity and personal details will always remain confidential.

## Benefits and risks to you

The direct benefit to you is that you get to participate in this new program, either now (Group 1) or in future (Group 2), which may help you improve your blood sugar levels and eating plan. Access to this new program is not available anywhere else. Participation is free.

Regardless of whether you're in Group 1 or Group 2 (waiting list), your participation in this research is *very* important, because no web-based study such as this has yet been conducted. This means the results of this study will make a valuable contribution to knowledge that may be used to better support you and other people with type 2 diabetes across Australia.

Potential risks include short-term physical pain or discomfort in taking some of the tests or questionnaires.

For example:

- You may experience short-term pain and discomfort when self-administering the HbA1c finger-prick test.
- You may feel uncomfortable when we ask you to fill in the online forms to share your demographic information such as how long you have had type 2 diabetes, your age, gender, ethnicity, relationship status, employment status and so forth.
- You may feel uncomfortable when we ask you some personal questions related to your eating attitudes, diet, weight or height.
- You may experience short-term physical discomfort when you modify your eating plan. These may include constipation, bad breath, headaches, muscle cramps, tiredness and fatigue, hunger and cravings, or hypoglycaemia. These symptoms are rare but they can occur in some people. We will provide you with education on what the potential symptoms are and how to minimise or manage them.
- If you choose to participate in an interview after the program you may feel uncomfortable

1 during the interview process. The interviewer will discuss how the interview works and you  
2 can pass on any questions you do not want to answer. Participation in an interview is  
3 voluntary.  
4

5  
6 If you experience distress of any kind, please contact the free counseling and support services listed  
7 below:

8  
9 **beyondblue**

10 [www.beyondblue.org.au](http://www.beyondblue.org.au)

11 1300 22 4636  
12

13  
14 **Lifeline Australia**

15 [www.lifeline.org.au](http://www.lifeline.org.au)

16 13 11 14  
17

18  
19 **Your privacy and confidentiality**  
20

21 Your privacy and confidentiality are very important to us.  
22

23 Participation in this research study is completely voluntary. If you do not wish to take part you are  
24 not obliged to, and this decision will not be held against you in any way.  
25

26 If you decide to take part and later change your mind, you are free to withdraw from the project at  
27 any stage up until data analysis commences.  
28

29 With your permission, the information collected will be retained to ensure that the results of the  
30 research project can be measured properly. You should be aware that any information collected by  
31 the research team will form part of the research project results. If you withdraw, the information  
32 collected will be stored securely but will not be used.  
33  
34

35 Any information obtained in connection with this research project that can identify you will remain  
36 strictly confidential and will only be used for the purpose of conducting the research project. All your  
37 results will be labeled with a unique ID code. The researchers will have access to your details and the  
38 results obtained from the study, which will be held securely at the Institute for Physical Activity and  
39 Nutrition (IPAN), Deakin University. In addition, the HbA1c test company, Nutripath, will be  
40 provided with your personal details (name, address, phone, email, DOB, gender) in order to  
41 collect your blood sample and assess the results of your HbA1c test. Nutripath data is  
42 protected, managed and stored in reference to ISO15189 standards.  
43  
44

45  
46 Your usage of the website may include provision of a username and password, your email address,  
47 tracking of your IP address and website usage. This information is accessible by the research and  
48 development team only. To protect your privacy, this website (<https://T2Dietstudy.com.au>) is hosted  
49 on a secure dedicated server, which has DDOS protection and an IP-based firewall. The website is  
50 further protected by a private certified Secure Sockets Layer (SSL) and via a restricted access  
51 software for participant login and usage purposes. After the study your information will be deleted  
52 from the website.  
53  
54

55 To comply with government requirements all data will be stored securely for a period of 15 years  
56 after final publication. It will then be destroyed.  
57  
58  
59  
60

## 1           **Compensation for your time**

2  
3           All participants completing this study will receive a \$30 Coles or Woolworths voucher.

## 4 5           **Declaration of funding**

6  
7           Funding for this project has been secured from IPAN PhD student fund (A\$ 2500/year awarded to  
8           Jedha Dening 2019-2021), a National Heart Foundation Vanguard Grant and an NHMRC Emerging  
9           Leader Fellowship grants (Dr Shariful Islam). These funds will be sufficient to purchase the HbA1c test  
10          kits, qualitative data transcription and providing participants with \$ 30 gift voucher for participation.

## 11 12 13          **Declarations of interests**

14  
15          This research is being conducted by Jedha Dening who is a PhD Candidate at Deakin  
16          University. Jedha is also the co-owner of Diabetes Meal Plans (DMP), a web-based type 2  
17          diabetes nutrition service, who licensed the web-platform for this study.

## 18 19 20          **Distribution of the study results**

21  
22          Results of the study will be published in scientific journals and presented in conferences. If you wish  
23          to access to the results, you may contact the researchers in the future.

24  
25          Your information will be non-identifiable in any publication.

26  
27          Where appropriate or if the opportunity arises, the results of this study may also be disseminated or  
28          discussed across social media, in press releases, via consumer or professional publications (online or  
29          print), or via radio or TV media.

30  
31          No identifiable information will be included in any study publication or media. Your details will  
32          always remain confidential.

## 33 34          **Your access to study results**

35  
36          The HbA1c test company will send you the HbA1c self-test kits and when you post them back  
37          using the reply-paid envelope, the company will process the results and we will notify you of  
38          the result by email.

39  
40  
41          At the end of the study, we will email you an overall summary of the findings and outcomes of the  
42          research.

## 43 44 45 46 47          **Complaints**

48          If you have any complaints about any aspect of the project, the way it is being conducted or any  
49          questions about your rights as a research participant, then you may contact:

50  
51  
52          The Human Research Ethics Office, Deakin University, 221 Burwood Highway, Burwood Victoria 3125,  
53          Telephone: 9251 7129, [research-ethics@deakin.edu.au](mailto:research-ethics@deakin.edu.au)

54  
55          Please quote project number 2020-349

**Your consent**

If you wish to participate in this study, please click the button below to complete the consent process.

After you provide your consent, you will be redirected to another web form to fill in the eligibility and eating attitudes questionnaires.

After you complete the questionnaires, the researchers will be in touch with you to discuss the next steps.

CLICK HERE TO COMPLETE YOUR CONSENT TO PARTICIPATE

For peer review only

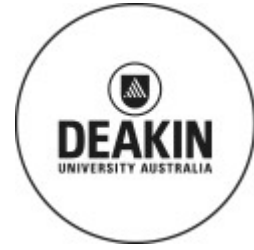

## PLAIN LANGUAGE STATEMENT AND CONSENT FORM

**TO: PARTICIPANT**

|                     |
|---------------------|
| <b>Consent Form</b> |
|---------------------|

**Date:**

**Full Project Title: Web-based diet intervention for adults with type 2 diabetes**

**Reference Number:**

---

### T2Diet Study Participant Consent Form

Please check the boxes below to indicate your acknowledgement:

- I have read the information provided and I understand the study and what my participation involves.
- I am aware I will be randomly allocated to Group 1 (T2Diet program right away) or Group 2 (wait list).
- The researcher has agreed not to reveal my identity and personal details. My identity will remain confidential.
- I give permission for my personal details (name, email, address, DOB, phone, gender) to be shared with the HbA1c test company so they can ship the HbA1c self-test kits to me.
- I give permission for the HbA1c test company to provide the results of my HbA1c tests to the researchers involved in this study.
- I give permission for my data to be reidentified by the research team in the event that there is missing information (e.g., in my self-reported food intake), and to be contacted by the researcher or their research assistant for the purposes of clarifying that information.
- I freely agree to participate in this study according to the conditions outlined.

If you would like to participate in an interview after the study to share your experience during the T2Diet study, please check the boxes below, otherwise leave blank.

- Yes, I give permission to be contacted after the study to attend an interview
- I am aware that my participation in an interview will involve an audio recording and I give my consent to record the interview session. My personal identity will remain confidential.

Please enter your full name

.....

1 Please provide your email address

2 .....  
3

4 Please provide your mobile phone number

5 .....  
6

7  
8 Date

9 .....  
10

11  
12 By clicking the button below, you acknowledge that your participation in the study is  
13 voluntary, you are 18 years of age or above, and that you are aware that you may  
14 choose to terminate your participation in the study at any time before data analysis  
15 commences, and for any reason.  
16

17  
18 By clicking the button below, you provide your consent to be contacted by the  
19 researchers and participate in this study.  
20

- 21
- 22 • I consent to participate
- 23

24 After you provide your consent above, **please click the arrows below**, you will now be  
25 redirected to another page to fill in a questionnaire to confirm your eligibility to participate.  
26



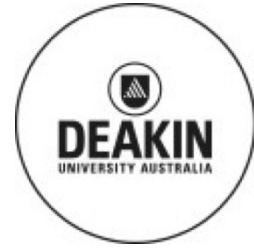

1  
2  
3  
4  
5  
6  
7  
8 **PLAIN LANGUAGE STATEMENT AND CONSENT FORM**  
9

10 **TO: Participants**  
11  
12  
13

14 **Withdrawal of Consent Form**  
15

16 *(To be used for participants who wish to withdraw from the project)*  
17

18 Participation in this research study is completely voluntary. You are free to withdraw from  
19 the project at any stage up until data analysis commences.  
20

21 If you withdraw, the information collected will be stored securely but will not be used.  
22

23 Project title: Web-based diet intervention for adults with type 2 diabetes  
24

25 Please enter your full name  
26

27 .....

28 Email address  
29

30 .....

31 Date  
32

33 .....

34  
35  
36 Please check the box below to withdraw your consent, then click the arrow below to submit  
37 this form.  
38

- 39  I hereby wish to WITHDRAW my consent to participate in the above research project  
40 and understand that such withdrawal WILL NOT jeopardise my relationship with  
41 Deakin University or the researchers.  
42  
43  
44  
45  
46  
47  
48  
49  
50  
51  
52  
53  
54  
55  
56  
57  
58  
59  
60

# BMJ Open

## Randomized controlled trial of a web-based low carbohydrate diet intervention for adults with type 2 diabetes: The T2Diet study protocol

|                                 |                                                                                                                                                                                                                                                                                                                                                                                                                                                                                                                                                                                                                          |
|---------------------------------|--------------------------------------------------------------------------------------------------------------------------------------------------------------------------------------------------------------------------------------------------------------------------------------------------------------------------------------------------------------------------------------------------------------------------------------------------------------------------------------------------------------------------------------------------------------------------------------------------------------------------|
| Journal:                        | <i>BMJ Open</i>                                                                                                                                                                                                                                                                                                                                                                                                                                                                                                                                                                                                          |
| Manuscript ID                   | bmjopen-2021-054594.R1                                                                                                                                                                                                                                                                                                                                                                                                                                                                                                                                                                                                   |
| Article Type:                   | Protocol                                                                                                                                                                                                                                                                                                                                                                                                                                                                                                                                                                                                                 |
| Date Submitted by the Author:   | 08-Nov-2021                                                                                                                                                                                                                                                                                                                                                                                                                                                                                                                                                                                                              |
| Complete List of Authors:       | Dening, Jedha; Deakin University, Institute for Physical Activity and Nutrition, School of Exercise and Nutrition Sciences<br>George, Elena; Deakin University, Institute for Physical Activity and Nutrition, School of Exercise and Nutrition Sciences<br>Ball, Kylie; Deakin University, Institute for Physical Activity and Nutrition, School of Exercise and Nutrition Sciences<br>Mohebbi, Mohammadreza ; Deakin University, Biostatistics Unit, Faculty of Health<br>Shariful Islam, Sheikh Mohammed; Deakin University, Institute for Physical Activity and Nutrition, School of Exercise and Nutrition Sciences |
| <b>Primary Subject Heading</b>: | Diabetes and endocrinology                                                                                                                                                                                                                                                                                                                                                                                                                                                                                                                                                                                               |
| Secondary Subject Heading:      | Public health, Nutrition and metabolism                                                                                                                                                                                                                                                                                                                                                                                                                                                                                                                                                                                  |
| Keywords:                       | General diabetes < DIABETES & ENDOCRINOLOGY, NUTRITION & DIETETICS, PUBLIC HEALTH, Clinical trials < THERAPEUTICS, World Wide Web technology < BIOTECHNOLOGY & BIOINFORMATICS                                                                                                                                                                                                                                                                                                                                                                                                                                            |
|                                 |                                                                                                                                                                                                                                                                                                                                                                                                                                                                                                                                                                                                                          |

SCHOLARONE™  
Manuscripts

1  
2  
3 **Randomized controlled trial of a web-based low carbohydrate diet intervention for**  
4 **adults with type 2 diabetes: The T2Diet study protocol**  
5

6  
7 Jedha Dening<sup>1</sup>, Elena George<sup>1#</sup>, Kylie Ball<sup>1#</sup>, Mohammadreza Mohebbi<sup>2</sup>, Sheikh Mohammed  
8 Shariful Islam<sup>1#</sup>  
9

10  
11  
12 # Equal Contribution  
13  
14  
15

16 <sup>1</sup> Institute for Physical Activity and Nutrition, School of Exercise and Nutrition Sciences, Deakin  
17 University, Locked Bag 20000, Geelong, Victoria, 3220, Australia  
18

19  
20 <sup>2</sup> Biostatistics Unit, Faculty of Health, Deakin University, Locked Bag 20000, Geelong, Victoria,  
21 3220, Australia  
22  
23

24  
25 **Corresponding Author:**

26  
27 Jedha Dening

28 Institute for Physical Activity and Nutrition

29 School of Exercise and Nutrition Sciences

30  
31 Deakin University

32  
33 Locked Bag 20000

34  
35 Geelong, Victoria, 3220

36  
37 Australia

38  
39 Phone: 61 3 924 68393

40  
41 Email: [deningje@deakin.edu.au](mailto:deningje@deakin.edu.au)  
42  
43  
44  
45

46 **Word count**

47 Abstract: 296; Keywords: 6; Article: 4353 (highlights and all text included); Figures: 2; Tables:

48  
49 1; References: 79.  
50  
51  
52  
53  
54  
55  
56  
57  
58  
59  
60

## Abstract

**Introduction:** Type 2 diabetes (T2D) management frequently involves a multidisciplinary care team. However, standard care for T2D patients is the central role of the general practice physician, and consists of routine appointments to monitor glycemic status and overall health. Dietary modification is an essential component of T2D management. Evidence suggests a low carbohydrate diet (LCD) provides better clinical outcomes for people with T2D compared to other diets. However, providing dietary support in face-to-face settings is challenged by issues of availability and accessibility. Provided in conjunction with standard care, digital interventions can help bridge this gap. The objective of this paper is to describe the protocol of a randomized controlled trial (RCT) of a web-based intervention that will evaluate the effectiveness of standard care plus web-based LCD intervention when compared to standard care only.

**Methods and analysis:** In a two-arm parallel RCT, 100 adults with non-insulin-dependent T2D aged between 40-89 years will be randomized to either a theoretically-informed 16-week automated web-based LCD intervention plus standard care or standard care only. LCD recommendations emphasize consuming nutrient-dense whole foods and encourage a daily carbohydrate goal of 50-100 grams, with an objective of achieving 10-26% carbohydrates from total energy intake. Assessments will take place at baseline and 16-weeks. The primary outcome will be hemoglobin A1c (HbA1c). Additional data collected will include dietary intake, self-efficacy, weight and height, anti-diabetes medication and dosages, and diabetes-related comorbidities. Process evaluation will consist of a mixed-methods assessment of website engagement metrics, user experience, and participants' perspectives.

**Ethics and dissemination:** All study procedures have been approved by the Deakin University Human Research Ethics Committee (2020-349). Study findings will be disseminated widely through public, professional, and academic presentation and publication.

**Trial registration:** The trial has been prospectively registered with the Australian New Zealand Clinical Trials Registry (ACTRN12621000096853).

**Keywords:** Type 2 diabetes, low carbohydrate diet, glycemic control, self-management, web-based, HbA1c.

### Strengths and limitations of this study

- To the best of our knowledge, this is the first RCT to evaluate the effectiveness of a web-based low carbohydrate diet (10-26% energy intake) intervention on glycemic control in adults with type 2 diabetes.
- A key strength of the study is the randomized controlled design and robust outcome assessment using hemoglobin A1c that will minimize bias and maximize the validity of the study findings.
- One limitation is no long term follow up, as this was not feasible for this study.

### Introduction

The global burden of T2D was estimated at 462 million individuals in 2017 [1]. Due to metabolic changes, T2D results in high glycemic status, frequently measured by HbA1c. The primary treatment goal is to assist people with T2D to achieve a HbA1c below 7.0% [2]. However, in 2020, estimates indicated 50% of adults with T2D had uncontrolled T2D, with HbA1c levels above the treatment goal [3]. Uncontrolled T2D significantly contributes to the development of diabetes complications and mortality [3]. Management of T2D frequently involves engagement of a multidisciplinary healthcare team to ensure the needs of individuals are met comprehensively. However, the general practice physician (GP) plays the central role in providing standard care for T2D management [4]. Standard care for patients with T2D consists of routine health checks with their GP to monitor glycemic status, diabetes complications and overall health [2, 4]. In addition, guidelines suggest healthy behavior should be routinely encouraged before or in conjunction with pharmacological treatment if necessary [2, 4].

1  
2  
3 Dietary modification plays an integral role in diabetes management, in improving glycaemic  
4 control and overall health [2]. In terms of diet, a low fat, moderate-high carbohydrate diet has  
5 traditionally been a common dietary recommendation provided to people with T2D [4, 5].  
6  
7 However, a growing body of evidence has demonstrated that LCDs, defined as 10- $<$ 26%  
8 carbohydrate of total energy intake [6, 7], may be more optimal for improving clinical outcomes  
9  
10 in people with T2D [6, 8, 9]. LCDs had previously been viewed as controversial. However, the  
11  
12 growing body of evidence has prompted updates across international diabetes care guidelines,  
13  
14 which have acknowledged LCDs as a safe and viable dietary option for people with T2D [2, 10-  
15  
16 12]. Systematic reviews and meta-analyses of LCDs in people with T2D have consistently  
17  
18 demonstrated greater improvements in glycaemic control, increases in HDL cholesterol, decreases  
19  
20 in triglycerides, reduced medication requirements [6, 8, 9, 13, 14], and potential for diabetes  
21  
22 remission [9]. In addition, significant improvements have been demonstrated in people with T2D  
23  
24 provided with LCD recommendations through routine clinical care [15].  
25  
26

27 LCD interventions for people with T2D have typically been delivered in face-to-face settings [8].  
28  
29 However, people with T2D face substantial challenges in accessing dietary support due to  
30  
31 limited availability, accessibility, and cost barriers [2, 16-18]. Provided in conjunction with  
32  
33 standard care, web-based interventions can help bridge this gap, offering the potential for greater  
34  
35 reach and accessibility, with the advantage of being convenient and on-demand to participants  
36  
37 when required [19]. Systematic reviews of web-based comprehensive self-management  
38  
39 interventions in people with T2D have demonstrated favorable improvements in glycaemic  
40  
41 control [20-22]. Preliminary evidence suggested web-based dietary interventions may be an  
42  
43 effective way to support dietary change and improved glycaemic status in adults with T2D [23].  
44  
45 Furthermore, web-based interventions in people with T2D have shown promise as a cost-  
46  
47 effective option [24], with the capacity to be widely implemented to support routine primary care  
48  
49 [25]. No RCT to date has assessed the effectiveness of a LCD intervention in individuals with  
50  
51 T2D, delivered in a web-based setting.

52 The study protocol for a RCT of a web-based LCD program for adults with T2D is presented  
53  
54 here. The primary aim of this study is to determine the effectiveness of a web-based LCD  
55  
56 intervention on glycaemic control in adults with T2D. We hypothesize that the web-based LCD  
57  
58  
59  
60

1  
2  
3 intervention plus standard care will result in better glycaemic control—lower HbA1c levels—at  
4 16 weeks compared to standard care alone in adults with T2D. Secondary aims are to assess  
5 changes in dietary intake, self-efficacy, weight and body mass index (BMI), anti-diabetes  
6 medication and diabetes-related comorbidities; and to assess process outcomes related to user  
7 engagement and experience.  
8  
9  
10  
11  
12

## 13 **Methods**

### 14 **Study design**

15  
16 The T2Diet study is a 16-week two-arm parallel RCT that aims to investigate the effectiveness of  
17 a web-based LCD intervention plus standard care versus standard care alone on glycaemic control  
18 in 100 Australian-based adults with T2D (Figure 1). A period of 16 weeks was chosen as  
19 previous web-based dietary interventions demonstrated significant improvements in glycaemic  
20 control could be achieved within this timeframe [23].  
21  
22  
23  
24  
25  
26  
27

28 Inclusion criteria will be adults aged 40-89 years, the most highly affected demographic for T2D  
29 in Australia [26], with self-reported non-insulin-dependent T2D and self-reported HbA1c levels  
30  $\geq 7.0\%$  within the previous six months; access to the Internet; an active email address; able to  
31 read and understand English; based in Australia; and willing and able to provide informed  
32 consent. All eligible participants with self-reported HbA1c levels  $\geq 7.0\%$  within the previous six  
33 months will be included, once baseline HbA1c measurements are conducted any reports returned  
34 as normal  $\leq 5.6\%$  [2] will result in participants being excluded. Exclusion criteria will be people  
35 with type 1 diabetes, prediabetes or gestational diabetes; people with diagnosed renal or  
36 cardiovascular disease; people with a terminal disease or severe complications compromising the  
37 quality of life of the participant and their ability to participate according to the protocol; women  
38 who are pregnant or lactating; people who have undergone bariatric surgery; vegetarians or  
39 vegans; people currently on a weight loss program or who have taken a weight loss program  
40 within the past 3 months; people enrolled in other clinical studies; and people at risk of  
41 disordered eating, assessed during screening with the Eating Attitudes Test-26 [27, 28].  
42 Participants identified with potential eating disorders will be referred to The Butterfly  
43 Foundation National Helpline [29]. Informed consent will be obtained from eligible participants  
44 prior to entry into the study.  
45  
46  
47  
48  
49  
50  
51  
52  
53  
54  
55  
56  
57  
58  
59  
60

## Figure 1. Study flow chart

### Intervention

The intervention is a theoretically informed 16-week automated web-based LCD behavior change support program. Existing website resources were provided for this study. Subsequently, four phases of inquiry were conducted with end-users (adults with T2D) to inform development of the new web-based dietary intervention. The weekly behavior change modules adopt various behavior change techniques [30] and were constructed upon a theoretical framework, consisting of: 1) self-efficacy theory [31]—self-efficacy being a key determinant of self-care behaviors and glycemic control in T2D [32-35]; 2) positive message framing—using language that communicates benefits rather than scare tactics [36, 37]; and, 3) principles of persuasive technology—using technology as a means of persuasively communicating intervention content [38].

### Dietary recommendations

Intervention participants will receive web-based recommendations to consume an *ad libitum* LCD [13], and encouraged to consume between 50-100 grams carbohydrates per day [6]. The overall goal is to achieve a low carbohydrate intake, defined as 10- $<$ 26% total energy intake [6, 7]. Web-based resources emphasize high consumption of non-starchy vegetables, adequate dietary fiber, and selection of nutrient-dense sources of lower carbohydrate foods [2]. Participants will be instructed to avoid or minimize high carbohydrate food and beverage sources such as added sugar, sugar-sweetened beverages [2, 5, 39], starchy foods [15, 40], and discretionary foods [2, 5, 39]. There will be no specific prescription for other macronutrients. However, based on estimated energy intake for the demographic of this study ranging from 1600 calories/6694 kilojoules to 2400 calories/10041 kilojoules [41], the protein and fat ranges are estimated to fall between 60-180 grams (15-30% estimated energy intake) and 80-200 grams (45-75% estimated energy intake), respectively [2, 42-44]. Web-based recommendations encourage nutrient-dense sources of protein and fat [15, 40], emphasizing consumption of polyunsaturated and monounsaturated fat [2, 39], and suggesting reduced-fat dairy may be preferred [45]. To facilitate implementation, skills-based resources such as recipes, information



1  
2  
3 on T2D, food and beverage choices, menu examples, eating out tips, menu planning and food  
4 preparation tips, an interactive planner, and cooking demonstrations will be provided.  
5  
6  
7

### 8 *Web-based intervention delivery*

9  
10 Intervention participants will be provided with login details for the study website to access the  
11 weekly modules and on-demand resources. The weekly modules consist of short videos with  
12 brief overviews, links to further resources, recipe suggestions, and action steps (Figure 2). These  
13 delivery methods, particularly the use of video, have been shown to address various levels of  
14 literacy [46], enhance engagement [47], and support health behavior change [48]. The weekly  
15 modules will be delivered sequentially, however, participants can continue to access any  
16 previous weeks' modules, along with accessing on-demand resources at any time. To prompt  
17 website usage and performance of behavioral actions, reminders will be sent to participants via  
18 email twice per week [46, 49]. It is estimated participants will login to the website once per  
19 week.  
20  
21  
22  
23  
24  
25  
26  
27

### 28 *Adverse effects*

29  
30 Intervention participants will be provided with education about and resources on how to manage  
31 potential adverse effects of carbohydrate reduction, such as constipation, headache and brain fog,  
32 halitosis, muscle cramps, tiredness and fatigue, hunger and cravings, and heart palpitations [15,  
33 50]; temporary hypoglycemic-like symptoms; hypoglycemia, defined as a blood glucose level  
34  $<70\text{mg/dL}/<4.0\text{mmol/L}$ —emphasized for any participant taking sulfonylurea medications [51];  
35 and to identify symptoms of ketoacidosis, for any participant taking sodium glucose  
36 cotransporter 2 inhibitor medications [2, 51]. Participants will be able to report adverse effects  
37 via an online form. If participants request assistance, they will be directed to appropriate  
38 resources, and/or, advised to consult with their treating physician. Any adverse effects will be  
39 documented and reported with trial outcomes.  
40  
41  
42  
43  
44  
45  
46  
47  
48  
49

### 50 *Intervention group follow-up*

51 Approximately three days after being provided with login details for the study website,  
52 intervention group participants will be followed up by email or phone to draw their attention to  
53 the potential adverse effects of carbohydrate reduction, cautions regarding medications, and to  
54  
55  
56  
57  
58  
59  
60

1  
2  
3 encourage participants to discuss their participation in the study with their GP and healthcare  
4 team. Participants will be able to download a study information letter they can give to their GP or  
5 healthcare team.  
6  
7

### 8 9 10 *Standard care*

11 Participants in both groups will be advised to continue with their standard care, defined by the  
12 Royal Australian College of General Practitioners [4], as routine appointments with their  
13 physician to monitor glycemic control, diabetes complications, and other health parameters.  
14  
15

### 16 17 18 **Control condition**

19 The control group will be standard care, as defined above. Participants in the control group will  
20 be on a waitlist and provided with the opportunity to participate in the intervention after  
21 completing the study.  
22  
23  
24  
25  
26  
27  
28

## 29 **Figure 2: Presentation format of the weekly behavior change modules**

### 30 31 32 33 34 **Outcomes**

35 Primary and secondary outcomes will be measured at baseline and immediately post-intervention  
36 (16 weeks). An overview of study measures, data collection instruments and their timepoints is  
37 presented in Table 1. The primary outcome will be glycemic control measured by the mean  
38 difference of change in HbA1c between intervention and control group from baseline to 16  
39 weeks. For secondary outcomes, dietary intake data—food, beverages and dietary supplements,  
40 will be collected to assess participants' adherence to the recommended LCD. We will also  
41 explore improvements in the quality of the participants' diet such as changes in discretionary  
42 food intake and vegetable consumption, and changes to individuals' overall macro and  
43 micronutrient intake and food groups. In addition, we will explore the association between  
44 adherence to diet and glycemic control. Self-efficacy will be measured to assess whether  
45 participants' self-efficacy improves and whether self-efficacy predicts and promotes greater  
46 changes in glycemic control [32-35]. Weight and height will be collected to assess change in  
47  
48  
49  
50  
51  
52  
53  
54  
55  
56  
57  
58  
59  
60

1  
2  
3 weight and BMI (kg/m<sup>2</sup>). Anti-diabetes medication and dosages and diabetes-related  
4 comorbidities [4] will be collected to assess changes.  
5  
6  
7

### 8 *Process evaluation*

9

10 Post-intervention, a mixed-methods approach [52] will be used to explore website utilization,  
11 user engagement and experience, in the intervention group only. Two forms of quantitative data  
12 will be collected: 1) website and email usage rates for frequency, intensity and duration metrics  
13 [53], collected for each week of the 16-week intervention; and 2) a self-administered  
14 questionnaire using the User Engagement Scale short form [54] and Honeycomb Model [55, 56].  
15 To collect qualitative data, a maximum of 20 participants [57] will be invited to attend a semi-  
16 structured phone interview. Process evaluation will be reported separately to the primary and  
17 secondary outcomes of this trial.  
18  
19  
20  
21  
22  
23  
24  
25  
26  
27  
28  
29  
30  
31  
32  
33  
34  
35  
36  
37  
38  
39  
40  
41  
42  
43  
44  
45  
46  
47  
48  
49  
50  
51  
52  
53  
54  
55  
56  
57  
58  
59  
60

**Table 1. Summary of outcome measures, data collection instruments and timepoint**

| Measures                                               | Instrument                                                                                                                                          | Timepoint |          |
|--------------------------------------------------------|-----------------------------------------------------------------------------------------------------------------------------------------------------|-----------|----------|
|                                                        |                                                                                                                                                     | Baseline  | 16 weeks |
| Demographic information                                | Structured questionnaire, self-reported via an online request form.                                                                                 | X         |          |
| <b>Primary outcome</b>                                 |                                                                                                                                                     |           |          |
| Hemoglobin A1c (%)                                     | Collected and assessed using the Nutripath Integrative Pathology Services HbA1c test.                                                               | X         | X        |
| <b>Secondary outcomes</b>                              |                                                                                                                                                     |           |          |
| Dietary intake: food, beverage and dietary supplements | Assessed via self-reported 24-hour food recall using study-specific online questionnaire, analysis using FoodWorks professional nutrition software. | X         | X        |
| Self-efficacy                                          | Self-reported via an online request form using the Diabetes Management Self-Efficacy Scale—Australian version [58].                                 | X         | X        |
| Weight/BMI                                             | Self-reported weight and height, via a study-specific online request form.                                                                          | X         | X        |
| Anti-diabetes medication and dosages                   | Self-reported, via a study-specific online request form.                                                                                            | X         | X        |
| <b>Exploratory outcome</b>                             |                                                                                                                                                     |           |          |
| Diabetes-related comorbidities                         | Self-reported, via a study-specific online request form.                                                                                            | X         | X        |
| <b>Process outcomes (Intervention group only)</b>      |                                                                                                                                                     |           |          |
| Website utilization                                    | Website and email usage metrics.                                                                                                                    | ←         | →        |

|                                |                                                                                                                         |  |   |
|--------------------------------|-------------------------------------------------------------------------------------------------------------------------|--|---|
| User engagement and experience | Self-reported using the User Engagement Scale short form [54] and Honeycomb Model [55, 56], via an online request form. |  | X |
| Participants' experience       | Semi-structured phone interviews with up to 20 participants.                                                            |  | X |

### Sample size

A total of 100 participants (50 per group) will provide 80% power at *type I error of 0.05* to detect a between-group difference of 0.5% on HbA1c (primary outcome). The sample size is based on the following assumptions: a standard deviation of 0.9 HbA1c [59, 60], a pre-post intervention correlation of 0.5 [61], and a dropout rate of 20% [62, 63]. The effect size of 0.5% was chosen as it is considered a clinically meaningful HbA1c reduction [64]. This may seem large for a relatively short intervention. However, it is not vastly different to previous LCD studies in people with T2D, where 6-month durations with smaller sample sizes demonstrated reductions in HbA1c of approximately 0.6% [59, 60, 65]. Previous LCD studies have indicated low dropout rates (<10%) [60, 65] and the average dropout across five web-based dietary interventions in people with T2D was approximately 22% [23]. Therefore, a 20% dropout was considered reasonable for this study. The sample size calculation was conducted by an independent statistician using Stata's power twomeans command.

### Recruitment

Enrolment of 100 participants will occur nationally across Australia using social media (primarily Facebook, Twitter and LinkedIn); networking with colleagues and acquaintances; community publications, newsletters or radio; through diabetes clinics, community organizations, fitness centers or medical centers; snowballing; and if necessary, paid online advertising via Facebook. All recruitment channels will direct interested participants to a plain language statement webpage where participants can voluntarily provide their informed consent. After giving informed consent, participants are immediately redirected to the eligibility screening questionnaire. Eligible participants will then be required to complete all baseline measurements (Table 1) before being randomized to their allocated group. Following intervention completion at 16-weeks, participants will be required to complete the same measurements, excluding

1  
2  
3 demographic details and height (Table 1). Recruitment started in February 2021 and is expected  
4 to be completed by December 2021.  
5  
6  
7

### 8 **Assignment of interventions**

9  
10 Participants will be randomized in a 1:1 ratio to standard care (control group) or standard care  
11 plus web-based LCD intervention (intervention group) using block randomization with varying  
12 random block sizes and stratified by age and gender. A computer-generated predetermined  
13 randomization schedule will be produced and held off-site by an independent statistician, who  
14 will indicate the group allocation as eligible participants are recruited. The group allocation will  
15 be concealed from researchers and participants until all baseline measures have been collected  
16 and the independent statistician has conducted the randomization. Post intervention outcomes,  
17 except the primary outcome, will be assessed via participant self-report. Primary outcome  
18 assessment will be blinded as HbA1c samples are assessed by the pathology lab with no  
19 disclosure of group allocation. Data analysts will be blinded to group allocation.  
20  
21  
22  
23  
24  
25  
26  
27  
28

### 29 **Data collection tools**

30  
31 Aside from HbA1c, all points of data collection will occur online through structured  
32 questionnaires with self-reported entries, for both groups. Demographic information such as age,  
33 gender, duration of T2D, family history of T2D, country of birth, employment status, education  
34 level, relationship status, and smoking status will be collected at baseline for descriptive  
35 purposes.  
36  
37  
38  
39  
40

41 HbA1c will be assessed by Nutripath Integrative Pathology Services. Participants will be sent the  
42 HbA1c microsample self-administered test. Participants unable to collect a sufficient self-  
43 administered sample will be sent the HbA1c pathology-assisted blood draw test. In both  
44 instances, the HbA1c test kits will be mailed to participants and back to the pathology service.  
45 HbA1c is the most common clinical biomarker used to assess glycemic control in RCTs that  
46 include people with T2D [8].  
47  
48  
49  
50  
51  
52

53 Dietary intake will be assessed using 24-hour food recall, a comprehensive self-report instrument  
54 that is considered highly robust [66]. An online 24-hour food recall questionnaire will collect  
55  
56  
57  
58  
59  
60

1  
2  
3 participants' self-report of foods, beverages, and supplements consumed in the previous 24-hour  
4 period. Submissions will be reviewed and if necessary, participants will be contacted for  
5 additional detail. FoodWorks professional nutrition analysis software for Australia and New  
6 Zealand will be used.  
7  
8  
9

10  
11 Self-efficacy will be measured using the Diabetes Management Self-Efficacy Scale—Australian  
12 version [58], which has been validated for use in people with T2D in Australia. The scale  
13 contains 20 questions rated on a 10-point scale. Responses are then summed to present a single  
14 self-efficacy score. Higher scores indicate greater self-efficacy.  
15  
16  
17  
18

19  
20 Self-reported weight and height, anti-diabetes medication and dosages, and diabetes-related  
21 comorbidities will be collected. Online self-reported weight and height has been demonstrated to  
22 be a valid method [67]. The checklist of comorbidities was drawn from the Royal Australian  
23 College of General Practitioners guidelines on general practice management of T2D [4].  
24 Reductions in anti-diabetes medication are commonly reported in LCD studies in people with  
25 T2D [8, 13, 14]. It has been noted that this reflects an underestimation in the overall benefits of  
26 LCDs [68, 69]. Thus, consideration of the influence of medication requirements needs to be  
27 taken into account. The Medication Effect Score will be used to quantify and summarize the  
28 changes in anti-diabetes medication [70].  
29  
30  
31  
32  
33  
34  
35  
36  
37

### 38 **Participant retention and withdrawal**

39 To accommodate any loss, multiple imputations will be used to handle the missing data (either as  
40 primary or sensitivity analysis), using available data to minimize potential bias of estimated  
41 intervention effects due to non-random attrition. In addition, when measurement data is  
42 due/overdue, emails and/or text message reminders and phone calls to participants will be made.  
43 All participants completing this study will receive a \$30AUD shopping voucher. Participants are  
44 free to withdraw from the study for any reason, up until data analysis commences.  
45  
46  
47  
48  
49  
50

### 51 **Data management and protection against bias**

52 Significant measures have been put in place to ensure robust data management and integrity and  
53 protect against bias. Primary outcome reports and self-reported data files will be downloaded in  
54  
55  
56  
57  
58  
59

1  
2  
3 their wholly original unmodified form by the principal investigator and securely stored in a  
4 location inaccessible to other research team members. These original data files will not be  
5 modified. Copies of original data files will be provided to research team members as required.  
6  
7 Data that requires manual entry will be crosschecked against copies of the original data files by a  
8 second research team member. An independent statistician will be provided with a copy of the  
9 original or crosschecked data files to collate and clean the dataset in preparation for data  
10 analysis. Once complete, the coded, de-identified dataset will be securely stored by the principal  
11 investigator, as the lockdown dataset files, in a location inaccessible to other research team  
12 members. These lockdown dataset files will not be modified. Copies of the lockdown dataset will  
13 be shared with research team members as required. A dedicated study statistician will be  
14 provided with a copy of the lockdown dataset files to conduct the data analysis independently.  
15  
16  
17  
18  
19  
20  
21  
22  
23

### 24 **Monitoring**

25 Overall study monitoring occurs via monthly meetings involving the research team members.  
26  
27  
28

### 29 **Data availability statement**

30 Data will be available upon reasonable request.  
31  
32  
33

### 34 **Statistical methods**

35 All data will be imported into Stata for quantitative analysis. Baseline characteristics will be  
36 presented using descriptive statistics. The mean and standard deviation, or median and range,  
37 will be used to describe continuous variables. Frequencies and/or percentages will be used to  
38 describe categorical variables. Intervention effects (i.e., mean difference between intervention  
39 and control group) at 16 weeks will be evaluated by implementing an ANCOVA model for each  
40 outcome with the 16-week value of the outcome as the dependent variable, and treatment group  
41 and baseline outcome score as independent variables, and adjusting for stratification variables  
42 (age and gender). Multiple imputation techniques with missing at random assumption will be  
43 used to impute missing data due to dropouts or withdrawals to comply with the intention-to-treat  
44 approach. Sensitivity analysis will be performed to evaluate missing at random assumption for  
45 missing observation pattern. Subgroup analysis will be conducted with the duration of diabetes  
46 and gender. For the duration of diabetes, a median split will be used to define subgroups. P-value  
47  
48  
49  
50  
51  
52  
53  
54  
55  
56  
57  
58  
59  
60



1  
2  
3 0.05 will be used as the level of significance for the primary outcome and all secondary  
4 outcomes. Cohen's D effect size will be calculated and reported. For all continuous outcomes,  
5 data will be explored for deviation from the normal distribution assumptions. If necessary, a  
6 transformation of data (e.g., log transformation) or a non-parametric approach may be  
7 considered.  
8  
9

### 10 11 **Patient and public involvement**

12 Participants (adults with T2D) were engaged in four iterative phases of user-centered inquiry  
13 involving group discussions, which informed the development of the new web-based dietary  
14 intervention. Intervention participants will be involved in feedback during process evaluation.  
15  
16  
17  
18

### 19 20 **Ethics and dissemination**

21 All study procedures have been approved by the Deakin University Human Research Ethics  
22 Committee (2020-349). Any protocol amendments will be submitted for approval to the ethics  
23 committee prior to implementation and communicated via an update of the Australian and New  
24 Zealand Clinical Trial Registry.  
25  
26  
27  
28

29  
30 Key audiences this research may benefit include the general public, researchers, clinicians,  
31 policymakers, and healthcare organizations [71-73]. Various methods may be used to  
32 disseminate the findings, including peer-reviewed publication, presentations, consumer and  
33 professional publication, and social media [73, 74]. Participants involved in the study will be  
34 sent a summary report of the study's main outcomes via email. In any dissemination of research  
35 findings, participants' identities will remain confidential.  
36  
37  
38  
39  
40  
41

### 42 43 **Limitations and strengths**

44 One limitation is this study will not collect biomarkers related to cardiometabolic risk, which  
45 was beyond the scope of this trial. While more research is needed in this area, the overall  
46 evidence suggests LCDs may be associated with cardiovascular benefits, as commonly a  
47 reduction in triglycerides and an increase in HDL cholesterol are observed [6, 8, 13, 68, 69]. For  
48 LDL cholesterol, the evidence remains unclear due to mixed reports [9, 75-77]. In addition,  
49 blood pressure can be influenced by LCDs [78]. Given this web-based dietary intervention will  
50 be provided in conjunction with standard care, biomarkers such as lipid profiles and blood  
51  
52  
53  
54  
55  
56  
57  
58  
59  
60

1  
2  
3 pressure would continue to be routinely monitored by the participants GP or healthcare team.  
4  
5 The short duration of this trial is also a potential limitation. However, the duration was justified  
6 based on previous web-based dietary interventions [23], and given this will be the first RCT of a  
7 web-based LCD intervention, determining effectiveness prior to allocating additional time and  
8 resources will be important. Another potential limitation is the study will not measure other  
9 lifestyle-related factors such as physical activity or psychological well-being [2]. The  
10 intervention was not designed to influence these outcomes, and any differences should be  
11 adequately addressed through random distribution in an RCT design. In addition, improvements  
12 related to hunger and satiety have been previously noted in LCD studies [68, 69], though will not  
13 be collected for this trial. This study also has significant strengths. While only one primary  
14 biomarker will be included, it will enable this research to be conducted remotely. This makes the  
15 study highly feasible during COVID-19 when restrictions of movement and face-to-face contact  
16 can be limited. In addition, remote delivery will increase the capacity to include participants  
17 from wide geographical locations, which will be of benefit given support for people with T2D in  
18 rural and remote areas is less accessible [79]. Furthermore, the RCT design, allocation  
19 concealment and blinding are key strengths that will minimize bias and maximize the validity of  
20 the study findings.  
21  
22  
23  
24  
25  
26  
27  
28  
29  
30  
31  
32  
33

## 34 **Discussion**

35  
36 This study will conduct a RCT of standard care alone versus standard care plus web-based LCD  
37 intervention in adults with T2D, with the primary intervention objective of improving glycemic  
38 control. To meet the needs and context of end-users who will participate in the study, user-  
39 centered principles and involvement of end-users in numerous rounds of feedback and iterative  
40 development were employed. The weekly behavior change modules apply various behavior  
41 change techniques and were constructed upon a theoretical framework to help strengthen  
42 communication of the intervention, address literacy levels, and maintain engagement. In  
43 addition, the email reminder notifications aim to boost website usage and motivation to  
44 participate.  
45  
46  
47  
48  
49  
50  
51  
52

53 This study will be the first RCT of a LCD intervention for adults with T2D, delivered in a web-  
54 based setting. The findings will contribute valuable insights into whether a LCD is effective  
55  
56  
57  
58  
59  
60

1  
2  
3 when delivered in a web-based environment; and whether such an intervention could be  
4 considered to support T2D management more broadly. Further, this study will contribute new  
5 knowledge to inform future digitally-delivered dietary interventions that could be used to reach a  
6 greater number of people with T2D and other health conditions across Australia and  
7 internationally.  
8  
9  
10  
11  
12

### 13 **Acknowledgment**

14 We thank Dr Gavin Abbott and Professor Ralph Maddison from Deakin University Institute of  
15 Physical Activity and Nutrition for their contributions.  
16  
17  
18  
19

### 20 **Funding**

21 This work will be supported by allocated annual PhD student funds from Deakin University  
22 Institute of Physical Activity and Nutrition.  
23  
24  
25  
26

### 27 **Conflicts of Interest**

28 JD is co-owner of Diabetes Meal Plans, a web-based nutrition support service for people  
29 with type 2 diabetes and prediabetes, who licensed the web-platform for this study.  
30  
31  
32  
33

### 34 **Authorship**

35 JD conceived and designed the study and wrote the manuscript. SI, EG, KB made critical  
36 contributions to the study design and provided critical input and revisions to the  
37 manuscript. MM contributed to the study design and provided critical revisions of the  
38 manuscript. All authors provided final approval for submission of the manuscript.  
39  
40  
41  
42  
43  
44

### 45 **Abbreviations**

46 BMI: body mass index  
47 GP: general practice physician  
48 HbA1c: hemoglobin A1c  
49 LCD: low carbohydrate diet  
50 RCT: randomized controlled trial  
51 T2D: type 2 diabetes  
52  
53  
54  
55  
56  
57  
58  
59  
60

## References

1. Khan, MAB, Hashim, MJ, King, JK, et al., *Epidemiology of Type 2 Diabetes - Global Burden of Disease and Forecasted Trends*. J Epidemiol Glob Health, 2020. **10**(1): p. 107-111. <https://doi.org/10.2991/jegh.k.191028.001>.
2. American Diabetes Association, *Standards of Medical Care in Diabetes—2021*. Diabetes Care, 2021. **44**: p. S1-S232. <https://doi.org/10.2337/dc21-in01>.
3. Centers for Disease Control and Prevention. *Risk Factors for Diabetes-Related Complications*. 2020 June 30, 2020 [cited 2021 22 March]; Available from: <https://www.cdc.gov/diabetes/data/statistics-report/risks-complications.html>.
4. The Royal Australian College of General Practitioners, *Management of type 2 diabetes: A handbook for general practice*. 2020.
5. Diabetes Australia. *What Should I Eat?* 2020 [cited 2021 April 28]; Available from: <https://www.diabetesaustralia.com.au/food-activity/eating-well/what-should-i-eat/>.
6. McArdle, PD, Greenfield, SM, Rilstone, SK, et al., *Carbohydrate restriction for glycaemic control in Type 2 diabetes: a systematic review and meta-analysis*. Diabet Med, 2019. **36**(3): p. 335-348. <https://doi.org/10.1111/dme.13862>.
7. Dening, J and Islam, SMS, *Defining a low carbohydrate diet: Proposal for a standardized consensus of carbohydrate intake (Carb-Cal Model)*. Diabetes Res Clin Pract, 2020. **166**: p. 108284. <https://doi.org/10.1016/j.diabres.2020.108284>.
8. Huntriss, R, Campbell, M, and Bedwell, C, *The interpretation and effect of a low-carbohydrate diet in the management of type 2 diabetes: a systematic review and meta-analysis of randomised controlled trials*. Eur J Clin Nutr, 2018. **72**(3): p. 311-325. <https://doi.org/10.1038/s41430-017-0019-4>.
9. Goldenberg, JZ, Day, A, Brinkworth, GD, et al., *Efficacy and safety of low and very low carbohydrate diets for type 2 diabetes remission: systematic review and meta-analysis of published and unpublished randomized trial data*. BMJ, 2021. **372**: p. m4743. <https://doi.org/10.1136/bmj.m4743>.
10. Diabetes Australia, *Position statement: Low carbohydrate eating for people with diabetes*. 2018.
11. Evert, AB, Dennison, M, Gardner, CD, et al., *Nutrition Therapy for Adults With Diabetes or Prediabetes: A Consensus Report*. Diabetes Care, 2019. **42**(5): p. 731-754. <https://doi.org/10.2337/dci19-0014>.
12. Davies, MJ, D'Alessio, DA, Fradkin, J, et al., *Management of Hyperglycemia in Type 2 Diabetes, 2018. A Consensus Report by the American Diabetes Association (ADA) and the European Association for the Study of Diabetes (EASD)*. Diabetes Care, 2018. **41**(12): p. 2669-2701. <https://doi.org/10.2337/dci18-0033>.

13. Sainsbury, E, Kizirian, NV, Partridge, SR, et al., *Effect of dietary carbohydrate restriction on glycemic control in adults with diabetes: A systematic review and meta-analysis*. *Diabetes Res Clin Pract*, 2018. **139**: p. 239-252. <https://doi.org/10.1016/j.diabres.2018.02.026>.
14. Snorgaard, O, Poulsen, GM, Andersen, HK, et al., *Systematic review and meta-analysis of dietary carbohydrate restriction in patients with type 2 diabetes*. *BMJ Open Diabetes Res Care*, 2017. **5**(1): p. e000354. <https://doi.org/10.1136/bmjdr-2016-000354>.
15. Unwin, D, Khalid, AA, Unwin, J, et al., *Insights from a general practice service evaluation supporting a lower carbohydrate diet in patients with type 2 diabetes mellitus and prediabetes: a secondary analysis of routine clinic data including HbA1c, weight and prescribing over 6 years*. *BMJ Nutrition, Prevention & Health*, 2020. <https://doi.org/10.1136/bmjnp-2020-000072>.
16. Australian Diabetes Educators Association. *Workforce in Diabetes Education*. 2019 [cited 2019 19 August]; Available from: <https://members.adea.com.au/resources-2/workforce-in-diabetes-education/>.
17. Kennedy, M and Dunning, T, *Diabetes education: Essential but underfunded in Australia*. *Diabetes & Primary Care Australia*, 2017. **2**(1): p. 10-4.
18. Odgers-Jewell, K, Isenring, EA, Thomas, R, et al., *Group-based education for patients with type 2 diabetes: a survey of Australian dietitians*. *Aust J Prim Health*, 2017. **23**(4): p. 364-372. <https://doi.org/10.1071/PY16156>.
19. Karekla, M, Kasinopoulos, O, Neto, DD, et al., *Best Practices and Recommendations for Digital Interventions to Improve Engagement and Adherence in Chronic Illness Sufferers*. *European Psychologist*, 2019. **24**(1): p. 49-67. <https://doi.org/10.1027/1016-9040/a000349>.
20. Cotterez, AP, Durant, N, Agne, AA, et al., *Internet interventions to support lifestyle modification for diabetes management: a systematic review of the evidence*. *J Diabetes Complications*, 2014. **28**(2): p. 243-51. <https://doi.org/10.1016/j.jdiacomp.2013.07.003>.
21. Pereira, K, Phillips, B, Johnson, C, et al., *Internet delivered diabetes self-management education: a review*. *Diabetes Technol Ther*, 2015. **17**(1): p. 55-63. <https://doi.org/10.1089/dia.2014.0155>.
22. Kebede, MM, Zeeb, H, Peters, M, et al., *Effectiveness of Digital Interventions for Improving Glycemic Control in Persons with Poorly Controlled Type 2 Diabetes: A Systematic Review, Meta-analysis, and Meta-regression Analysis*. *Diabetes Technol Ther*, 2018. **20**(11): p. 767-782. <https://doi.org/10.1089/dia.2018.0216>.
23. Denning, J, Islam, SMS, George, E, et al., *Web-Based Interventions for Dietary Behavior in Adults With Type 2 Diabetes: Systematic Review of Randomized Controlled Trials*. *J Med Internet Res*, 2020. **22**(8): p. e16437. <https://doi.org/10.2196/16437>.
24. Murray, E, Sweeting, M, Dack, C, et al., *Web-based self-management support for people with type 2 diabetes (HeLP-Diabetes): randomised controlled trial in English primary care*. *BMJ Open*, 2017. **7**(9). <https://doi.org/10.1136/bmjopen-2017-016009>.
25. Ross, J, Stevenson, F, Dack, C, et al., *Developing an implementation strategy for a digital health intervention: an example in routine healthcare*. *BMC Health Serv Res*, 2018. **18**(1): p. 794. <https://doi.org/10.1186/s12913-018-3615-7>.
26. National Diabetes Service Scheme. *Diabetes data snapshots: Type 2 diabetes - March 2021*. 2021 [cited 2021 April 28]; Available from: <https://www.ndss.com.au/about-the-ndss/diabetes-facts-and-figures/diabetes-data-snapshots/>.

27. Young-Hyman, DL and Davis, CL, *Disordered eating behavior in individuals with diabetes: importance of context, evaluation, and classification*. *Diabetes Care*, 2010. **33**(3): p. 683-9. <https://doi.org/10.2337/dc08-1077>.
28. Garner, D, Olmsted, M, Bohr, Y, et al., *The eating attitudes test: psychometric features and clinical correlates*. *Psychol Med*, 1982. **12**(4): p. 871-8. <https://doi.org/0.1017/s0033291700049163>.
29. The Butterfly Foundation. *Talking helps. Butterfly National Helpline*. 2021; Available from: <https://butterfly.org.au/Get%20Support/Helpline/>.
30. Michie, S, Richardson, M, Johnston, M, et al., *The behavior change technique taxonomy (v1) of 93 hierarchically clustered techniques: building an international consensus for the reporting of behavior change interventions*. *Ann Behav Med*, 2013. **46**(1): p. 81-95. <https://doi.org/10.1007/s12160-013-9486-6>.
31. Bandura, A, *Self-efficacy: The exercise of control*. 9th ed. 1997, New York: W.H Freeman and Company.
32. Indelicato, L, Dauriz, M, Santi, L, et al., *Psychological distress, self-efficacy and glycemic control in type 2 diabetes*. *Nutr Metab Cardiovasc Dis*, 2017. **27**(4): p. 300-306. <https://doi.org/10.1016/j.numecd.2017.01.006>.
33. Brown, SA, Garcia, AA, Brown, A, et al., *Biobehavioral determinants of glycemic control in type 2 diabetes: A systematic review and meta-analysis*. *Patient Educ Couns*, 2016. **99**(10): p. 1558-67. <https://doi.org/10.1016/j.pec.2016.03.020>.
34. Ouyang, CM, Dwyer, JT, Jacques, PF, et al., *Determinants of dietary self-care behaviours among Taiwanese patients with type 2 diabetes*. *Asia Pac J Clin Nutr*, 2015. **24**(3): p. 430-7. <https://doi.org/10.6133/apjcn.2015.24.3.02>.
35. Strychar, I, Elisha, B, and Schmitz, N, *Type 2 Diabetes Self-Management: Role of Diet Self-Efficacy*. *Canadian Journal of Diabetes*, 2012. **36**(6): p. 337-344. <https://doi.org/10.1016/j.jcjd.2012.10.005>.
36. Paragas, ED, Jr. and Barcelo, TI, *Effects of message-framed informational videos on diabetes management knowledge and self-efficacy*. *Int J Nurs Pract*, 2019. **25**(4): p. e12737. <https://doi.org/10.1111/ijn.12737>.
37. Gans, KM, Risica, PM, Dulin-Keita, A, et al., *Innovative video tailoring for dietary change: final results of the Good for you! cluster randomized trial*. *Int J Behav Nutr Phys Act*, 2015. **12**: p. 130. <https://doi.org/10.1186/s12966-015-0282-5>.
38. Kelders, SM, Kok, RN, Ossebaard, HC, et al., *Persuasive system design does matter: a systematic review of adherence to web-based interventions*. *J Med Internet Res*, 2012. **14**(6): p. e152. <https://doi.org/10.2196/jmir.2104>.
39. National Health and Medical Research Council, *Australian Dietary Guidelines*. 2013: Canberra.
40. Turton, J, Brinkworth, GD, Field, R, et al., *An evidence-based approach to developing low-carbohydrate diets for type 2 diabetes management: A systematic review of interventions and methods*. *Diabetes Obes Metab*, 2019. **21**(11): p. 2513-2525. <https://doi.org/10.1111/dom.13837>.
41. U.S. Department of Health and Human Services and U.S. Department of Agriculture, *Dietary Guidelines for Americans*. 2015-2020(December 2015).
42. Sucher, S, Markova, M, Hornemann, S, et al., *Comparison of the effects of diets high in animal or plant protein on metabolic and cardiovascular markers in type 2 diabetes: A*

- 1  
2  
3 *randomized clinical trial*. *Diabetes Obes Metab*, 2017. **19**(7): p. 944-952.  
4 <https://doi.org/10.1111/dom.12901>.
- 5  
6 43. Gannon, M and Nuttall, F, *Effect of a High-Protein, Low-Carbohydrate Diet on Blood*  
7 *Glucose Control in People With Type 2 Diabetes*. *Diabetes*, 2004. **53**(9): p. 2375-2382.  
8 <https://doi.org/10.2337/diabetes.53.9.2375>.
- 9  
10 44. Pedersen, E, Jesudason, DR, and Clifton, PM, *High protein weight loss diets in obese*  
11 *subjects with type 2 diabetes mellitus*. *Nutr Metab Cardiovasc Dis*, 2014. **24**(5): p. 554-62.  
12 <https://doi.org/10.1016/j.numecd.2013.11.003>.
- 13  
14 45. Heart Foundation. *Dairy & Heart Healthy Eating*. 2019 [cited 2021 April 28]; Available  
15 from: [https://www.heartfoundation.org.au/getmedia/b7f8c612-c1eb-4139-b4b1-](https://www.heartfoundation.org.au/getmedia/b7f8c612-c1eb-4139-b4b1-898d8302d234/Nutrition_Position_Statement_-_DAIRY.pdf)  
16 [898d8302d234/Nutrition\\_Position\\_Statement\\_-\\_DAIRY.pdf](https://www.heartfoundation.org.au/getmedia/b7f8c612-c1eb-4139-b4b1-898d8302d234/Nutrition_Position_Statement_-_DAIRY.pdf).
- 17  
18 46. Pal, K, Dack, C, Ross, J, et al., *Digital Health Interventions for Adults With Type 2 Diabetes:*  
19 *Qualitative Study of Patient Perspectives on Diabetes Self-Management Education and*  
20 *Support*. *J Med Internet Res.*, 2018. **2**(20): p. e40. <https://doi.org/10.2196/jmir.8439>.
- 21  
22 47. Abu Abed, M, Himmel, W, Vormfelde, S, et al., *Video-assisted patient education to modify*  
23 *behavior: a systematic review*. *Patient Educ Couns*, 2014. **97**(1): p. 16-22.  
24 <https://doi.org/10.1016/j.pec.2014.06.015>.
- 25  
26 48. Desroches, S, Lapointe, A, Ratté, S, et al., *Interventions to enhance adherence to dietary*  
27 *advice for preventing and managing chronic diseases in adults*. *Cochrane Database of*  
28 *Systematic Reviews*, 2013. <https://doi.org/10.1002/14651858.CD008722.pub2>.
- 29  
30 49. LeRouge, C and Wickramasinghe, N, *A Review of User-Centered Design for Diabetes-*  
31 *Related Consumer Health Informatics Technologies*. *J Diabetes Sci Techno*, 2013. **7**(4).  
32 <https://doi.org/10.1177/193229681300700429>.
- 33  
34 50. Churuangasuk, C, Lean, MEJ, and Combet, E, *Lower carbohydrate and higher fat intakes are*  
35 *associated with higher hemoglobin A1c: findings from the UK National Diet and Nutrition*  
36 *Survey 2008-2016*. *Eur J Nutr*, 2020. **59**(6): p. 2771-2782. [https://doi.org/10.1007/s00394-](https://doi.org/10.1007/s00394-019-02122-1)  
37 [019-02122-1](https://doi.org/10.1007/s00394-019-02122-1).
- 38  
39 51. Murdoch, C, Unwin, D, Cavan, D, et al., *Adapting diabetes medication for low carbohydrate*  
40 *management of type 2 diabetes: a practical guide*. *Br J Gen Pract*, 2019. **69**(684): p. 360-361.  
41 <https://doi.org/10.3399/bjgp19X704525>.
- 42  
43 52. Creswell, J, *A Concise Introduction to Mixed Methods Research*. 2015, California: Sage  
44 Publications.
- 45  
46 53. Short, CE, DeSmet, A, Woods, C, et al., *Measuring Engagement in eHealth and mHealth*  
47 *Behavior Change Interventions: Viewpoint of Methodologies*. 2018.  
48 <https://doi.org/10.2196/preprints.9397>.
- 49  
50 54. O'Brien, HL, Cairns, P, and Hall, M, *A practical approach to measuring user engagement*  
51 *with the refined user engagement scale (UES) and new UES short form*. *International Journal*  
52 *of Human-Computer Studies*, 2018. **112**: p. 28-39. <https://doi.org/10.1016/j.ijhcs.2018.01.004>.
- 53  
54 55. Morville, P. *User Experience Honeycomb*. 2016 [cited 2019 Aug 29]; Available from:  
55 <https://intertwined.org/user-experience-honeycomb/>.
- 56  
57 56. University of Waterloo. *User Experience Design for Learning (UXDL)*. 2021 [cited 2021  
58 April 28]; Available from: <https://cms.cel.uwaterloo.ca/honeycomb/index.aspx>.
- 59  
60 57. Braun, V and Clarke, V, *To saturate or not to saturate? Questioning data saturation as a*  
*useful concept for thematic analysis and sample-size rationales*. *Qualitative Research in*  
*Sport, Exercise and Health*, 2019. **13**(2): p. 201-216.  
<https://doi.org/10.1080/2159676x.2019.1704846>.

- 1  
2  
3  
4  
5  
6  
7  
8  
9  
10  
11  
12  
13  
14  
15  
16  
17  
18  
19  
20  
21  
22  
23  
24  
25  
26  
27  
28  
29  
30  
31  
32  
33  
34  
35  
36  
37  
38  
39  
40  
41  
42  
43  
44  
45  
46  
47  
48  
49  
50  
51  
52  
53  
54  
55  
56  
57  
58  
59  
60
58. McDowell, JC, M. Edwards, H. Shortridge-Baggett, L., *Validation of the Australian/English version of the Diabetes Management Self-Efficacy Scale*. International Journal of Nursing Practice, 2005. **11**: p. 177–184. <https://doi.org/10.1111/j.1440-172x.2005.00518.x>.
  59. Yamada, Y, Uchida, J, Izumi, H, et al., *A Non-calorie-restricted Low-carbohydrate Diet is Effective as an Alternative Therapy for Patients with Type 2 Diabetes*. Internal Medicine, 2014. **53**(1): p. 13-19. <https://doi.org/10.2169/internalmedicine.53.0861>.
  60. Jonasson, L, Guldbrand, H, Lundberg, AK, et al., *Advice to follow a low-carbohydrate diet has a favourable impact on low-grade inflammation in type 2 diabetes compared with advice to follow a low-fat diet*. Ann Med, 2014. **46**(3): p. 182-7. <https://doi.org/10.3109/07853890.2014.894286>.
  61. Clifton, PM, Coles, LT, and Galbraith, CE, *Low Carbohydrate Diets in Type 2 Diabetes—A Translational Study*. Journal of Diabetes Mellitus, 2016. **06**(02): p. 152-157. <https://doi.org/10.4236/jdm.2016.62016>.
  62. Jahangiry, LS, D. Montazeri, A. Najafi, M. Mohammed, K. Yaseri M., *Adherence and Attrition in a Web-Based Lifestyle Intervention for People with Metabolic Syndrome*. Iranian J Publ Health, 2014. **43**(9): p. 1248-1258.
  63. Ramadas, A, Chan, CKY, Oldenburg, B, et al., *Randomised-controlled trial of a web-based dietary intervention for patients with type 2 diabetes: changes in health cognitions and glycaemic control*. BMC Public Health, 2018. **18**(1): p. 716. <https://doi.org/10.1186/s12889-018-5640-1>.
  64. Heintjes, E, Penning-van Beest, FP, SV, Grandy, S, et al., *Population attributable risk (PAR) of macrovascular events associated with HbA1c, blood pressure or weight in patients with type 2 diabetes mellitus: Evidence from a dutch cohort*. Value in Health, 2011. **14**: p. A233-A510. <https://doi.org/10.1016/j.jval.2011.08.754>.
  65. Sato, J, Kanazawa, A, Makita, S, et al., *A randomized controlled trial of 130 g/day low-carbohydrate diet in type 2 diabetes with poor glycaemic control*. Clin Nutr, 2017. **36**(4): p. 992-1000. <https://doi.org/10.1016/j.clnu.2016.07.003>.
  66. National Cancer Institute. *Dietary Assessment Primer*. 2020; Available from: <https://dietassessmentprimer.cancer.gov/>.
  67. Pursey, K, Burrows, TL, Stanwell, P, et al., *How accurate is web-based self-reported height, weight, and body mass index in young adults?* J Med Internet Res, 2014. **16**(1): p. e4. <https://doi.org/10.2196/jmir.2909>.
  68. Kelly, T, Unwin, D, and Finucane, F, *Low-Carbohydrate Diets in the Management of Obesity and Type 2 Diabetes: A Review from Clinicians Using the Approach in Practice*. Int J Environ Res Public Health, 2020. **17**(7). <https://doi.org/10.3390/ijerph17072557>.
  69. Wheatley, SD, Deakin, TA, Arjomandkhah, NC, et al., *Low Carbohydrate Dietary Approaches for People With Type 2 Diabetes-A Narrative Review*. Front Nutr, 2021. **8**: p. 687658. <https://doi.org/10.3389/fnut.2021.687658>.
  70. Alexopoulos, AS, Yancy, WS, Edelman, D, et al., *Clinical associations of an updated medication effect score for measuring diabetes treatment intensity*. Chronic Illn, 2021. **17**(4): p. 451-462. <https://doi.org/10.1177/1742395319884096>.
  71. National Health and Medical Research Council, *The Australian Code for the Responsible Conduct of Research*. 2018: Canberra.
  72. National Health and Medical Research Council, *Publication and dissemination of research: a guide supporting the Australian Code for the Responsible Conduct of Research*. 2020: Canberra.



- 1  
2  
3 73. Agency of Healthcare Research and Quality. *Communication and Dissemination Strategies To Facilitate the Use of Health and Health Care Evidence*. 2012; Available from:  
4 [https://effectivehealthcare.ahrq.gov/sites/default/files/pdf/medical-evidence-](https://effectivehealthcare.ahrq.gov/sites/default/files/pdf/medical-evidence-communication_research-protocol.pdf)  
5 [communication\\_research-protocol.pdf](https://effectivehealthcare.ahrq.gov/sites/default/files/pdf/medical-evidence-communication_research-protocol.pdf).  
6  
7  
8 74. Ross-Hellauer, T, Tennant, JP, Banelyte, V, et al., *Ten simple rules for innovative dissemination of research*. PLoS Comput Biol, 2020. **16**(4): p. e1007704.  
9 <https://doi.org/10.1371/journal.pcbi.1007704>.  
10  
11 75. Gjuladin-Hellon, T, Davies, IG, Penson, P, et al., *Effects of carbohydrate-restricted diets on low-density lipoprotein cholesterol levels in overweight and obese adults: a systematic review and meta-analysis*. Nutr Rev, 2019. **77**(3): p. 161-180. <https://doi.org/10.1093/nutrit/nuy049>.  
12  
13 76. Bhanpuri, NH, Hallberg, SJ, Williams, PT, et al., *Cardiovascular disease risk factor responses to a type 2 diabetes care model including nutritional ketosis induced by sustained carbohydrate restriction at 1 year: an open label, non-randomized, controlled study*. Cardiovasc Diabetol, 2018. **17**(1): p. 56. <https://doi.org/10.1186/s12933-018-0698-8>.  
14  
15 77. Mansoor, N, Vinknes, KJ, Veierod, MB, et al., *Effects of low-carbohydrate diets v. low-fat diets on body weight and cardiovascular risk factors: a meta-analysis of randomised controlled trials*. Br J Nutr, 2016. **115**(3): p. 466-79.  
16  
17 <https://doi.org/10.1017/S0007114515004699>.  
18  
19 78. Unwin, DJ, Tobin, SD, Murray, SW, et al., *Substantial and Sustained Improvements in Blood Pressure, Weight and Lipid Profiles from a Carbohydrate Restricted Diet: An Observational Study of Insulin Resistant Patients in Primary Care*. Int J Environ Res Public Health, 2019. **16**(15). <https://doi.org/10.3390/ijerph16152680>.  
20  
21 79. National Diabetes Service Scheme. *Living in rural and remote areas*. 2021 [cited 2021 6 Sept]; Available from: [https://www.ndss.com.au/living-with-diabetes/about-you/people-with-](https://www.ndss.com.au/living-with-diabetes/about-you/people-with-diabetes-living-in-rural-and-remote-areas/)  
22  
23 [diabetes-living-in-rural-and-remote-areas/](https://www.ndss.com.au/living-with-diabetes/about-you/people-with-diabetes-living-in-rural-and-remote-areas/).  
24  
25  
26  
27  
28  
29  
30  
31  
32  
33  
34  
35  
36  
37  
38  
39  
40  
41  
42  
43  
44  
45  
46  
47  
48  
49  
50  
51  
52  
53  
54  
55  
56  
57  
58  
59  
60

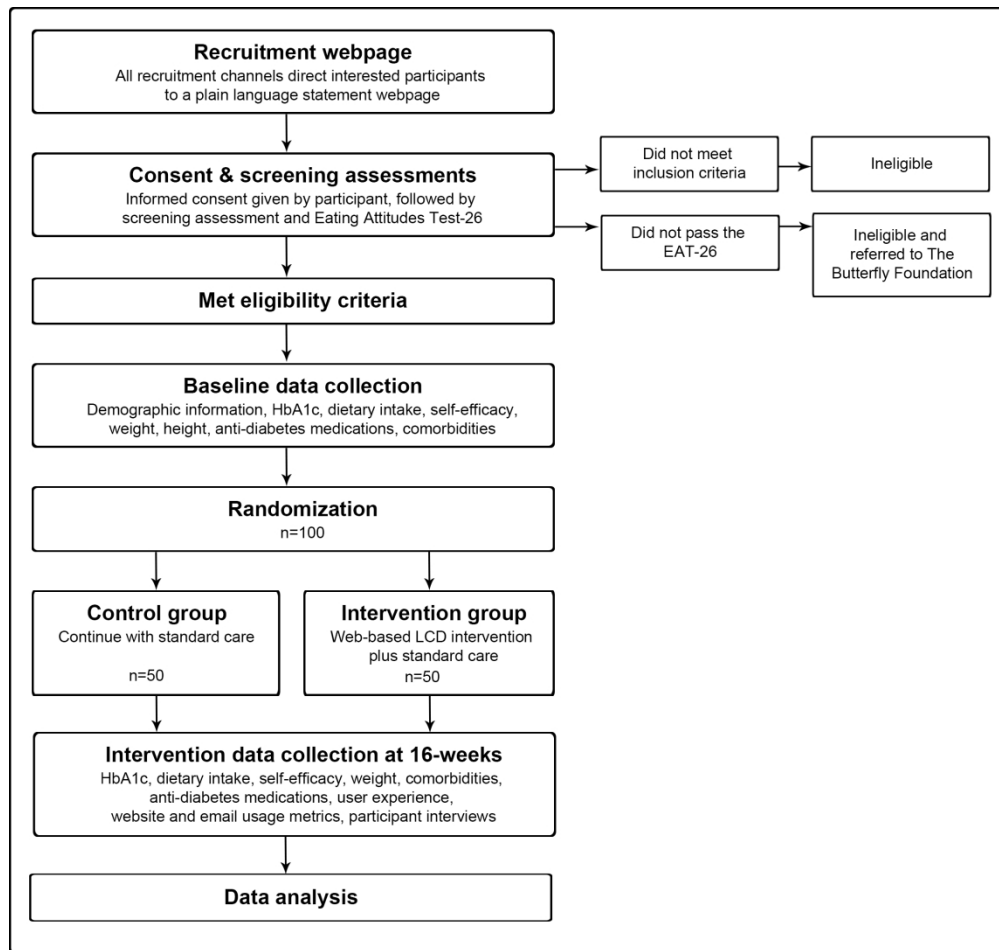

Study flow chart

201x190mm (300 x 300 DPI)

## Week 2 Modules

T2Diet guidelines recap Benefits of fibre Understanding T2D Healthy blood sugar Recipe suggestions Action steps

## Week 2. T2Diet Guidelines Recap (Video - 3:41 minutes)

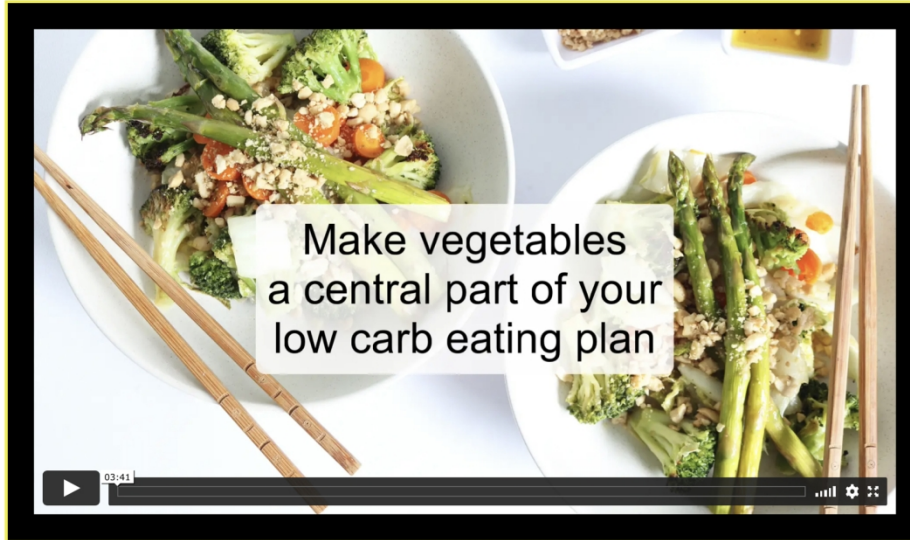

## Brief overview

**2 Essential Rules to Follow****Rule #1: Eat Nutrient Dense Real Food**

This means avoiding processed foods as much as possible and choosing fresh foods that contain more nutrients to help improve your health.

**Rule #2: Avoid or Minimise Sugar & Starchy Foods**

Sugar: many packaged food products contain high amounts of added sugar. Many beverages also contain a lot of sugar, including fruit juice which contains high amounts of naturally occurring sugar.

Starchy foods: potatoes, sweet potatoes, corn, bread, rice, pasta, noodles, cereals, flour and flour-based products.

Presentation format of the weekly behavior change modules

324x372mm (144 x 144 DPI)

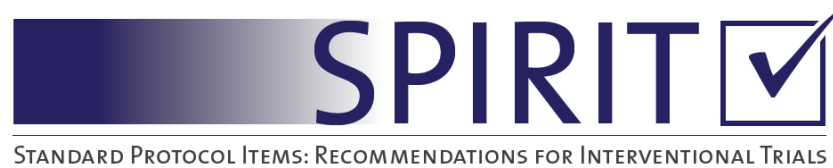

SPIRIT 2013 Checklist: Recommended items to address in a clinical trial protocol and related documents\*

| Section/item                      | Item No | Description                                                                                                                                                                                                                                                                              | Addressed on page number |
|-----------------------------------|---------|------------------------------------------------------------------------------------------------------------------------------------------------------------------------------------------------------------------------------------------------------------------------------------------|--------------------------|
| <b>Administrative information</b> |         |                                                                                                                                                                                                                                                                                          |                          |
| Title                             | 1       | Descriptive title identifying the study design, population, interventions, and, if applicable, trial acronym                                                                                                                                                                             | _____ 1 _____            |
| Trial registration                | 2a      | Trial identifier and registry name. If not yet registered, name of intended registry                                                                                                                                                                                                     | _____ 2 _____            |
|                                   | 2b      | All items from the World Health Organization Trial Registration Data Set                                                                                                                                                                                                                 | _____ NA _____           |
| Protocol version                  | 3       | Date and version identifier                                                                                                                                                                                                                                                              | _____ NA _____           |
| Funding                           | 4       | Sources and types of financial, material, and other support                                                                                                                                                                                                                              | _____ 17 _____           |
| Roles and responsibilities        | 5a      | Names, affiliations, and roles of protocol contributors                                                                                                                                                                                                                                  | _____ 1, 17 _____        |
|                                   | 5b      | Name and contact information for the trial sponsor                                                                                                                                                                                                                                       | _____ NA _____           |
|                                   | 5c      | Role of study sponsor and funders, if any, in study design; collection, management, analysis, and interpretation of data; writing of the report; and the decision to submit the report for publication, including whether they will have ultimate authority over any of these activities | _____ NA _____           |
|                                   | 5d      | Composition, roles, and responsibilities of the coordinating centre, steering committee, endpoint adjudication committee, data management team, and other individuals or groups overseeing the trial, if applicable (see Item 21a for data monitoring committee)                         | _____ 14 _____           |

|    |                                                           |     |                                                                                                               |                     |
|----|-----------------------------------------------------------|-----|---------------------------------------------------------------------------------------------------------------|---------------------|
| 1  | <b>Introduction</b>                                       |     |                                                                                                               |                     |
| 2  |                                                           |     |                                                                                                               |                     |
| 3  | Background and                                            | 6a  | Description of research question and justification for undertaking the trial, including summary of relevant   | ___ 3-5 ___         |
| 4  | rationale                                                 |     | studies (published and unpublished) examining benefits and harms for each intervention                        |                     |
| 5  |                                                           |     |                                                                                                               |                     |
| 6  |                                                           | 6b  | Explanation for choice of comparators                                                                         | ___ 3-5 ___         |
| 7  |                                                           |     |                                                                                                               |                     |
| 8  | Objectives                                                | 7   | Specific objectives or hypotheses                                                                             | ___ 4 ___           |
| 9  |                                                           |     |                                                                                                               |                     |
| 10 | Trial design                                              | 8   | Description of trial design including type of trial (eg, parallel group, crossover, factorial, single group), |                     |
| 11 |                                                           |     | allocation ratio, and framework (eg, superiority, equivalence, noninferiority, exploratory)                   | ___ 4, 5 ___        |
| 12 |                                                           |     |                                                                                                               |                     |
| 13 |                                                           |     |                                                                                                               |                     |
| 14 | <b>Methods: Participants, interventions, and outcomes</b> |     |                                                                                                               |                     |
| 15 |                                                           |     |                                                                                                               |                     |
| 16 | Study setting                                             | 9   | Description of study settings (eg, community clinic, academic hospital) and list of countries where data will | ___ 5, 11 ___       |
| 17 |                                                           |     | be collected. Reference to where list of study sites can be obtained                                          |                     |
| 18 |                                                           |     |                                                                                                               |                     |
| 19 | Eligibility criteria                                      | 10  | Inclusion and exclusion criteria for participants. If applicable, eligibility criteria for study centres and  | ___ 5 ___           |
| 20 |                                                           |     | individuals who will perform the interventions (eg, surgeons, psychotherapists)                               |                     |
| 21 |                                                           |     |                                                                                                               |                     |
| 22 | Interventions                                             | 11a | Interventions for each group with sufficient detail to allow replication, including how and when they will be | ___ 6-8 ___         |
| 23 |                                                           |     | administered                                                                                                  |                     |
| 24 |                                                           |     |                                                                                                               |                     |
| 25 |                                                           | 11b | Criteria for discontinuing or modifying allocated interventions for a given trial participant (eg, drug dose  | ___ NA ___          |
| 26 |                                                           |     | change in response to harms, participant request, or improving/worsening disease)                             |                     |
| 27 |                                                           |     |                                                                                                               |                     |
| 28 |                                                           | 11c | Strategies to improve adherence to intervention protocols, and any procedures for monitoring adherence        | ___ 6-8 ___         |
| 29 |                                                           |     | (eg, drug tablet return, laboratory tests)                                                                    |                     |
| 30 |                                                           |     |                                                                                                               |                     |
| 31 |                                                           | 11d | Relevant concomitant care and interventions that are permitted or prohibited during the trial                 | ___ NA ___          |
| 32 |                                                           |     |                                                                                                               |                     |
| 33 | Outcomes                                                  | 12  | Primary, secondary, and other outcomes, including the specific measurement variable (eg, systolic blood       | ___ 8-10, 12-13 ___ |
| 34 |                                                           |     | pressure), analysis metric (eg, change from baseline, final value, time to event), method of aggregation (eg, |                     |
| 35 |                                                           |     | median, proportion), and time point for each outcome. Explanation of the clinical relevance of chosen         |                     |
| 36 |                                                           |     | efficacy and harm outcomes is strongly recommended                                                            |                     |
| 37 |                                                           |     |                                                                                                               |                     |
| 38 | Participant timeline                                      | 13  | Time schedule of enrolment, interventions (including any run-ins and washouts), assessments, and visits for   | ___ 10 ___          |
| 39 |                                                           |     | participants. A schematic diagram is highly recommended (see Figure)                                          |                     |
| 40 |                                                           |     |                                                                                                               |                     |
| 41 |                                                           |     |                                                                                                               |                     |
| 42 |                                                           |     |                                                                                                               |                     |
| 43 |                                                           |     |                                                                                                               |                     |
| 44 |                                                           |     |                                                                                                               |                     |
| 45 |                                                           |     |                                                                                                               |                     |
| 46 |                                                           |     |                                                                                                               |                     |

1 Sample size 14 Estimated number of participants needed to achieve study objectives and how it was determined, including \_\_\_11\_\_\_  
 2 clinical and statistical assumptions supporting any sample size calculations

3  
 4 Recruitment 15 Strategies for achieving adequate participant enrolment to reach target sample size \_\_\_11\_\_\_  
 5

6  
 7 **Methods: Assignment of interventions (for controlled trials)**

8 Allocation:  
 9

10 Sequence 16a Method of generating the allocation sequence (eg, computer-generated random numbers), and list of any \_\_\_11-12\_\_\_  
 11 generation factors for stratification. To reduce predictability of a random sequence, details of any planned restriction  
 12 (eg, blocking) should be provided in a separate document that is unavailable to those who enrol participants  
 13 or assign interventions  
 14

15  
 16 Allocation 16b Mechanism of implementing the allocation sequence (eg, central telephone; sequentially numbered, \_\_\_11-12\_\_\_  
 17 concealment opaque, sealed envelopes), describing any steps to conceal the sequence until interventions are assigned  
 18 mechanism  
 19

20 Implementation 16c Who will generate the allocation sequence, who will enrol participants, and who will assign participants to 11-12\_\_\_  
 21 interventions  
 22

23  
 24 Blinding (masking) 17a Who will be blinded after assignment to interventions (eg, trial participants, care providers, outcome \_\_\_12\_\_\_  
 25 assessors, data analysts), and how  
 26

27 17b If blinded, circumstances under which unblinding is permissible, and procedure for revealing a participant's \_\_\_NA\_\_\_  
 28 allocated intervention during the trial  
 29  
 30

31 **Methods: Data collection, management, and analysis**  
 32

33 Data collection 18a Plans for assessment and collection of outcome, baseline, and other trial data, including any related \_\_\_12-14\_\_\_  
 34 methods processes to promote data quality (eg, duplicate measurements, training of assessors) and a description of  
 35 study instruments (eg, questionnaires, laboratory tests) along with their reliability and validity, if known.  
 36 Reference to where data collection forms can be found, if not in the protocol  
 37

38  
 39 18b Plans to promote participant retention and complete follow-up, including list of any outcome data to be \_\_\_13\_\_\_  
 40 collected for participants who discontinue or deviate from intervention protocols  
 41  
 42

|    |                                 |     |                                                                                                                                                                                                                                                                                                                                       |           |
|----|---------------------------------|-----|---------------------------------------------------------------------------------------------------------------------------------------------------------------------------------------------------------------------------------------------------------------------------------------------------------------------------------------|-----------|
| 1  | Data management                 | 19  | Plans for data entry, coding, security, and storage, including any related processes to promote data quality (eg, double data entry; range checks for data values). Reference to where details of data management procedures can be found, if not in the protocol                                                                     | __13-14__ |
| 2  |                                 |     |                                                                                                                                                                                                                                                                                                                                       |           |
| 3  |                                 |     |                                                                                                                                                                                                                                                                                                                                       |           |
| 4  |                                 |     |                                                                                                                                                                                                                                                                                                                                       |           |
| 5  | Statistical methods             | 20a | Statistical methods for analysing primary and secondary outcomes. Reference to where other details of the statistical analysis plan can be found, if not in the protocol                                                                                                                                                              | __14__    |
| 6  |                                 |     |                                                                                                                                                                                                                                                                                                                                       |           |
| 7  |                                 |     |                                                                                                                                                                                                                                                                                                                                       |           |
| 8  |                                 | 20b | Methods for any additional analyses (eg, subgroup and adjusted analyses)                                                                                                                                                                                                                                                              | __14__    |
| 9  |                                 |     |                                                                                                                                                                                                                                                                                                                                       |           |
| 10 |                                 | 20c | Definition of analysis population relating to protocol non-adherence (eg, as randomised analysis), and any statistical methods to handle missing data (eg, multiple imputation)                                                                                                                                                       | __14__    |
| 11 |                                 |     |                                                                                                                                                                                                                                                                                                                                       |           |
| 12 |                                 |     |                                                                                                                                                                                                                                                                                                                                       |           |
| 13 |                                 |     |                                                                                                                                                                                                                                                                                                                                       |           |
| 14 | <b>Methods: Monitoring</b>      |     |                                                                                                                                                                                                                                                                                                                                       |           |
| 15 |                                 |     |                                                                                                                                                                                                                                                                                                                                       |           |
| 16 | Data monitoring                 | 21a | Composition of data monitoring committee (DMC); summary of its role and reporting structure; statement of whether it is independent from the sponsor and competing interests; and reference to where further details about its charter can be found, if not in the protocol. Alternatively, an explanation of why a DMC is not needed | __14__    |
| 17 |                                 |     |                                                                                                                                                                                                                                                                                                                                       |           |
| 18 |                                 |     |                                                                                                                                                                                                                                                                                                                                       |           |
| 19 |                                 |     |                                                                                                                                                                                                                                                                                                                                       |           |
| 20 |                                 |     |                                                                                                                                                                                                                                                                                                                                       |           |
| 21 |                                 |     |                                                                                                                                                                                                                                                                                                                                       |           |
| 22 |                                 | 21b | Description of any interim analyses and stopping guidelines, including who will have access to these interim results and make the final decision to terminate the trial                                                                                                                                                               | __NA__    |
| 23 |                                 |     |                                                                                                                                                                                                                                                                                                                                       |           |
| 24 |                                 |     |                                                                                                                                                                                                                                                                                                                                       |           |
| 25 | Harms                           | 22  | Plans for collecting, assessing, reporting, and managing solicited and spontaneously reported adverse events and other unintended effects of trial interventions or trial conduct                                                                                                                                                     | __7__     |
| 26 |                                 |     |                                                                                                                                                                                                                                                                                                                                       |           |
| 27 |                                 |     |                                                                                                                                                                                                                                                                                                                                       |           |
| 28 | Auditing                        | 23  | Frequency and procedures for auditing trial conduct, if any, and whether the process will be independent from investigators and the sponsor                                                                                                                                                                                           | __14__    |
| 29 |                                 |     |                                                                                                                                                                                                                                                                                                                                       |           |
| 30 |                                 |     |                                                                                                                                                                                                                                                                                                                                       |           |
| 31 |                                 |     |                                                                                                                                                                                                                                                                                                                                       |           |
| 32 | <b>Ethics and dissemination</b> |     |                                                                                                                                                                                                                                                                                                                                       |           |
| 33 |                                 |     |                                                                                                                                                                                                                                                                                                                                       |           |
| 34 | Research ethics approval        | 24  | Plans for seeking research ethics committee/institutional review board (REC/IRB) approval                                                                                                                                                                                                                                             | __15__    |
| 35 |                                 |     |                                                                                                                                                                                                                                                                                                                                       |           |
| 36 |                                 |     |                                                                                                                                                                                                                                                                                                                                       |           |
| 37 | Protocol amendments             | 25  | Plans for communicating important protocol modifications (eg, changes to eligibility criteria, outcomes, analyses) to relevant parties (eg, investigators, REC/IRBs, trial participants, trial registries, journals, regulators)                                                                                                      | __15__    |
| 38 |                                 |     |                                                                                                                                                                                                                                                                                                                                       |           |
| 39 |                                 |     |                                                                                                                                                                                                                                                                                                                                       |           |
| 40 |                                 |     |                                                                                                                                                                                                                                                                                                                                       |           |
| 41 |                                 |     |                                                                                                                                                                                                                                                                                                                                       |           |
| 42 |                                 |     |                                                                                                                                                                                                                                                                                                                                       |           |

|    |                               |     |                                                                                                                                                                                                                                                                                     |            |
|----|-------------------------------|-----|-------------------------------------------------------------------------------------------------------------------------------------------------------------------------------------------------------------------------------------------------------------------------------------|------------|
| 1  | Consent or assent             | 26a | Who will obtain informed consent or assent from potential trial participants or authorised surrogates, and how (see Item 32)                                                                                                                                                        | ___ 11 ___ |
| 2  |                               |     |                                                                                                                                                                                                                                                                                     |            |
| 3  |                               |     |                                                                                                                                                                                                                                                                                     |            |
| 4  |                               | 26b | Additional consent provisions for collection and use of participant data and biological specimens in ancillary studies, if applicable                                                                                                                                               | ___ NA ___ |
| 5  |                               |     |                                                                                                                                                                                                                                                                                     |            |
| 6  |                               |     |                                                                                                                                                                                                                                                                                     |            |
| 7  | Confidentiality               | 27  | How personal information about potential and enrolled participants will be collected, shared, and maintained in order to protect confidentiality before, during, and after the trial                                                                                                | ___ 14 ___ |
| 8  |                               |     |                                                                                                                                                                                                                                                                                     |            |
| 9  |                               |     |                                                                                                                                                                                                                                                                                     |            |
| 10 | Declaration of interests      | 28  | Financial and other competing interests for principal investigators for the overall trial and each study site                                                                                                                                                                       | ___ 17 ___ |
| 11 |                               |     |                                                                                                                                                                                                                                                                                     |            |
| 12 |                               |     |                                                                                                                                                                                                                                                                                     |            |
| 13 | Access to data                | 29  | Statement of who will have access to the final trial dataset, and disclosure of contractual agreements that limit such access for investigators                                                                                                                                     | ___ 14 ___ |
| 14 |                               |     |                                                                                                                                                                                                                                                                                     |            |
| 15 |                               |     |                                                                                                                                                                                                                                                                                     |            |
| 16 |                               |     |                                                                                                                                                                                                                                                                                     |            |
| 17 | Ancillary and post-trial care | 30  | Provisions, if any, for ancillary and post-trial care, and for compensation to those who suffer harm from trial participation                                                                                                                                                       | ___ NA ___ |
| 18 |                               |     |                                                                                                                                                                                                                                                                                     |            |
| 19 |                               |     |                                                                                                                                                                                                                                                                                     |            |
| 20 | Dissemination policy          | 31a | Plans for investigators and sponsor to communicate trial results to participants, healthcare professionals, the public, and other relevant groups (eg, via publication, reporting in results databases, or other data sharing arrangements), including any publication restrictions | ___ 15 ___ |
| 21 |                               |     |                                                                                                                                                                                                                                                                                     |            |
| 22 |                               |     |                                                                                                                                                                                                                                                                                     |            |
| 23 |                               |     |                                                                                                                                                                                                                                                                                     |            |
| 24 |                               | 31b | Authorship eligibility guidelines and any intended use of professional writers                                                                                                                                                                                                      | ___ NA ___ |
| 25 |                               |     |                                                                                                                                                                                                                                                                                     |            |
| 26 |                               | 31c | Plans, if any, for granting public access to the full protocol, participant-level dataset, and statistical code                                                                                                                                                                     | ___ NA ___ |
| 27 |                               |     |                                                                                                                                                                                                                                                                                     |            |
| 28 |                               |     |                                                                                                                                                                                                                                                                                     |            |
| 29 | <b>Appendices</b>             |     |                                                                                                                                                                                                                                                                                     |            |
| 30 |                               |     |                                                                                                                                                                                                                                                                                     |            |
| 31 | Informed consent materials    | 32  | Model consent form and other related documentation given to participants and authorised surrogates                                                                                                                                                                                  | _____      |
| 32 |                               |     |                                                                                                                                                                                                                                                                                     |            |
| 33 |                               |     |                                                                                                                                                                                                                                                                                     |            |
| 34 | Biological specimens          | 33  | Plans for collection, laboratory evaluation, and storage of biological specimens for genetic or molecular analysis in the current trial and for future use in ancillary studies, if applicable                                                                                      | _____      |
| 35 |                               |     |                                                                                                                                                                                                                                                                                     |            |
| 36 |                               |     |                                                                                                                                                                                                                                                                                     |            |

\*It is strongly recommended that this checklist be read in conjunction with the SPIRIT 2013 Explanation & Elaboration for important clarification on the items. Amendments to the protocol should be tracked and dated. The SPIRIT checklist is copyrighted by the SPIRIT Group under the Creative Commons [“Attribution-NonCommercial-NoDerivs 3.0 Unported”](https://creativecommons.org/licenses/by-nc-nd/3.0/) license.
